# Supplementary material for: Retraction: Ashour, M., and Helal, A. (2012). “Response of Axially Loaded Piles in Sands with and without Seismically Induced Porewater Pressures.” Int. J. Geomech. , 10.1061/(ASCE)GM.1943-5622.0000273 (Dec. 1, 2012)
Source: Atypon-hosted journal article supplement (doi:10.1061/(asce)gm.1943-5622.0000692), 2016-04-09
Supplement: retracted_manuscript_gm.1943-5622.0000273.pdf [file retracted_manuscript_gm.1943-5622.0000273.pdf]

# Response of Axially Loaded Piles in Sands with and without Seismically Induced Porewater Pressures

Mohamed Ashour, M. ASCE<sup>1</sup>, Amr Helal <sup>2</sup>

## Abstract

The paper presents a procedure to predict the mobilized shaft resistance of axially loaded piles in medium dense sands with/without liquefaction (limited liquefaction). The technique is developed to assess the load transfer-settlement ( $t-z$ ) curve, and varying pile-side resistance and pile-head axial load versus the pile settlement in sands. The mobilized pile-side and tip resistances are determined based on stress-strain relationships of sands under drained and undrained conditions. The proposed approach allows the assessment of the  $t-z$  curve along the pile length under undrained conditions with the consideration of the porewater pressure (PWP) developing in surrounding sands. The presented model accounts for the variation of the PWP in the near-field soil under axial load which is combined with the influence of the free-field PWP generated by cyclic loading (post-seismic event). The study also employs an undrained constitutive model for sands with limited liquefaction to calculate the variation of shear stresses and strains in the surrounding soil along the length of the pile. A computer code is developed to implement the presented technique.

**Keywords:** Pile, shaft resistance; axial load; sand, liquefaction;  $t-z$  curve.

<sup>1</sup> Associate Professor, Dept. of Civil and Environmental Engineering, University of Alabama in Huntsville, USA  
Email: [ashour@eng.uah.edu](mailto:ashour@eng.uah.edu), and Associate Professor, College of Engineering, Mansuora University, Egypt  
Tel.: +1 256 824 5029; Fax: +1 256 824 6724.

<sup>2</sup>Graduate Research Assistant, Dept. of Civil and Environmental Engineering, University of Alabama in Huntsville,

## 22 **Introduction**

23 Piles in cohesionless soil gain their support from the tip resistance and transfer of axial load  
24 via the pile wall/shaft resistance along its length. The contribution of pile shaft resistance to the  
25 axial load carried by the pile proportionally increases with pile embedded length. It should be  
26 noted that both pile tip and skin resistance are interdependent. The estimation of the pile axial  
27 capacity relies heavily on empirical correlations. The pile shaft resistance is influenced by the  
28 state and properties of soils within the critical zone immediately surrounding the pile. In  
29 addition, the method utilized for driving the pile, the roughness of the pile surface (i.e. pile  
30 materials) and the state of the pile end (closed/open end) have their influence on the pile shaft  
31 resistance. Furthermore, in reality, soil profiles often consist of multiple layers of soils that may  
32 contain sand, clay and silt. The technique presented by Ashour et al. (2009) for axially loaded  
33 piles in clay is combined with the current procedure to analyze the axially loaded piles in sand  
34 and clay soil deposits.

35 The assessment of the mobilized load transfer of a pile in sand depends on the success in  
36 developing a representative (t-z) relationship. This can be achieved via empirical relationships  
37 or numerical methods. The load transfer-settlement (t-z) curve method is the most widely used  
38 technique to compute the response of axially loaded piles, and is particularly useful when the soil  
39 behavior is clearly nonlinear and/or when the soil surrounding the pile is stratified. This method  
40 involves modeling the pile as a series of elements (segments) supported by discrete nonlinear  
41 springs, which represent the soil-pile skin friction (t-z springs), along with a nonlinear pile tip  
42 (end - bearing)  $Q_p-z_p$  spring. Building on this work and based on additional empirical results,  
43 general recommendations for estimating t-z and  $Q_p-z_p$  curves for axially loaded piles in sands

44 have been proposed by Vijayvergiya (1977), API (1993), Altaee et al.(1992), Alawneh et  
45 al.(2001) and Seo et al. (2009).

46 t-z curves can also be constructed satisfactorily using a theoretical approach related to the  
47 shear stiffness of the soil surrounding the pile. Several methodologies to develop theoretically  
48 based load transfer curves have been proposed e.g., Kraft, et al. (1981); Chow (1986); McVay et  
49 al. (1989) and Randolph (1994).

50 Salgado et al. (2011) presented a mathematical formulation to perform a load-settlement  
51 analysis for a pile with circular cross section installed in multilayered elastic soil that accounts  
52 for both vertical and radial soil displacements. The analysis follows from the solution of the  
53 differential equations governing the displacements of the pile-soil system obtained using  
54 variational principles. The method is extension for the method of Seo and Prezzi (2007), which  
55 considers only vertical soil displacement.

56  
57 API (1993) recommends the use of empirical t-z curve for sands assuming the mobilized unit  
58 side shear stress ( $\tau$ ) to change linearly with the pile segment displacement ( $z$ ) till  $\tau$  reaches its  
59 maximum value ( $\tau_{\max}$ ) at  $z_c = 0.25$  mm. Vijayvergiya (1977) suggested an empirical nonlinear  
60 formula similar to the API one to calculate  $\tau$  as a function of  $z_c$ . Hoit et al. (2007) presented a  
61 study on the assessment of the t-z curves in sand based on the API recommendations which are  
62 also employed in some design software packages.

63 Coyle and Castello (1981) proposed design correlations for piles in sand using  $\delta$  average that  
64 was assumed equal to the residual angle of shearing resistance of the sand friction angle ( $\phi$ ).

65 Randolph and Wroth (1978) presented approximate analytical solution for analysis of settlement  
66 of single pile using theoretical formulations for 1) linear degradation of the shear stress ( $\tau$ ) and

67 displacement in the surrounding soil with the radial distance ( $r$ ) as a function of the shear stress  
 68 at the pile-soil interface ( $\tau_o$ ) and pile radius  $r_o$  (i.e.  $\tau = \tau_o r_o/r$ ); 2) a constant shear displacement  
 69 zone of influence ( $r_m$ ) along the length of the pile ( $L$ ) where the soil shear modulus at  $L/2$  and  
 70 pile tip are linked via a constant ratio ( $\rho$ ). By knowing  $L$ ,  $r_o$ , and  $r_m$ , Randolph and Wroth (1978)  
 71 developed the following equation to calculate the  $t$ - $z$  curve as a function of a constant  $G$   
 72 assuming a linear elastic soil.

$$z = \frac{\tau_o r_o}{G} \ln \left( \frac{r_m}{r_o} \right) \quad (1)$$

74 Where  $r_m = 2.5 L \rho (1 - \nu)$  and  $\nu =$  Poisson's ratio. Kraft et al. (1981) used the work done by  
 75 Randolph and Wroth (1978) to develop an equation for the  $t$ - $z$  curve using a hyperbolic stress-  
 76 strain relationship based on the initial shear modulus of sand ( $G_i$ ).

$$G = G_i \left[ 1 - \frac{\tau_o R_f}{\tau_{max}} \right]^2 = G_i [1 - \psi]^2 \quad (2)$$

$$z = \frac{\tau_o r_o}{G_i} \ln \left[ \left( \frac{r_m}{r_o} - \psi \right) / (1 - \psi) \right] \quad (3)$$

79  $R_f =$  stress-strain curve fitting constant, and  $\tau_{max}$  is the maximum shear stress at failure. Zhu  
 80 and Chang (2002) used modified hyperbolic models to assess the  $t$ - $z$  curve. Instead of using a  
 81 hyperbolic stress-strain relationship, Armaleh and Desai (1987) used Ramber-Osgood model to  
 82 assess the  $t$ - $z$  curve in sands.

83 The semi-empirical procedure presented in this paper for axially loaded piles utilizes the  
 84 stress-strain relationship of sand (Norris 1986 and Ashour et al. 1998) to obtain the  $t$ - $z$  curve and  
 85 pile shaft resistance in sand. The method of slices utilized in this technique determines the  
 86 degradation of shear stress/strain and vertical displacement within the vicinity of the axially

87 loaded pile under drained static conditions (pre-earthquake). As a result, the t-z curves and the  
88 variation of side resistance along the pile length can be assessed using a combination of tip and  
89 side resistance/displacement of the pile and associated pile elastic deformation. The presented  
90 pre-earthquake (i.e. drained) model shows the radial degradation of the shear stress ( $\tau$ ) and strain  
91 ( $\gamma$ ) in the sand critical zone around the pile starting from the soil-pile interface. In reality, it is  
92 recognized that mobilizing the shaft resistance requires very small movements, whereas  
93 mobilizing an ultimate toe resistance requires many times larger movement (Fellenius 1999).

94 The undrained stress-strain model of sands with limited liquefaction (Ashour et al. 2009) is  
95 employed to assess the t-z curve and skin resistance for the pile length into partially liquefied  
96 sand layers where the excess water pressure ratio ( $r_u$ ) is less than 1 along with the pile-head load  
97 settlement curve. Such a scenario of soil limited liquefaction is common to occur with medium  
98 dense sands ( $D_r = 35\% - 65\%$ ). It should be noted that the t-z curve is determined based on the  
99 mobilized tip and side resistance/displacement of the pile and associated pile elastic deformation.  
100 The pile tip in the presented study is embedded into a non-liquefiable soil layer (such as clay or  
101 dense sand). The presented model relies on the ability to develop and utilize pre- and post-  
102 limited liquefaction stress-strain relationship with drained and undrained conditions (i.e.  
103 considering the effect of varying far/free- and near-field porewater pressure  $u_{xs,ff}$  and  $u_{xs,nf}$ ,  
104 respectively). The development of full and limited liquefaction in the same sand stratum  
105 depends on the characteristics of the regional seismic activities (i.e. the magnitude of the  
106 earthquake  $M$  and the peak ground acceleration  $a_{max}$ ).

107

108 **Piles in liquefiable soils and failure mechanisms**

109 Because of the combination of axial and lateral loading on piles during or post a seismic event  
110 as a result of superstructure inertial force and/or lateral soil spreading, respectively, the influence  
111 of the axial load ( $P$ ) in association with lateral loads (i.e. pile deflection,  $\Delta$ ) is dominated via the  
112 excessive moment caused by  $P$ - $\Delta$  effect combined with lateral forces (Fig. 1c) with/without  
113 lateral spreading (Maheshwari and Sarkar 2011, Haldar and Babu 2010, Ashour and ardalan  
114 2011). While some focus has been given to the piles in fully liquefied soil layer(s) under axial  
115 loading as a source of pile buckling instability (Fig. 1a) (Bhattacharya et al. 2005, Shanker et al.  
116 2007, and Haldar and Babu 2010), no attention has been given to the axially loaded piles in soils  
117 with limited liquefaction (Fig. 1b) that could develop in medium dense sands ( $Dr = 35\% - 65\%$ )  
118 especially with moderate seismic events. For axially loaded pile segments embedded into  
119 liquefiable soil layers, current design procedures assume no sand resistance or reduced sand  
120 residual strength (American Association of State Highway and Transportation Officials,  
121 AASHTO, 2007) based on the free-field liquefaction potential with no consideration for  
122 developing near-field PWP. On the other side, some researchers have focused on the negative  
123 skin friction (Yao et al. 2012) and downdrag effect on the pile axial resistance that could take  
124 hours/days after liquefaction to develop according to the site geotechnical conditions (Fellenius  
125 and Siegel 2008 and Rollins and Strand 2006).

126 The paper studies the post-limited liquefaction loading scenario immediately after the end of  
127 the seismic event (i.e. superstructure inertial force = 0) in level ground (i.e. no possibility of  
128 lateral soil spreading to occur) where the axial load dominates the behavior of the pile. The  
129 paper highlights the drop in sand shear strength (medium dense sand) in response to the  
130 earthquake induced porewater pressure  $u_{xs,ff}$  with  $r_u < 1$  generating a state of limited soil  
131 liquefaction in the free-field that is associated with pile axial loading and related near-filed

132 porewater pressure,  $u_{xs,nf}$  (Fig. 2). The presented model assumes undrained conditions with no  
133 water pressure dissipation (i.e. no sand volume change) during a short period of time (few  
134 minutes) after the earthquake which is a common scenario that could happen due to the presence  
135 of clay layer or soil deposit with low permeability (more fines) above the liquefied sand layer.

136 Partially liquefied sand in the near-field of axially loaded pile experiences more degradation  
137 in its undrained strength ( $\sigma_d$ ) due to the buildup of the excess PWP (Fig. 2). The soil experiences  
138 developing (partial or limited) liquefaction in the free-field if  $r_u$  induced by the earthquake  
139 shaking (i.e.  $u_{xs,ff}$ ) is less than 1, and full liquefaction if  $r_u = 1$ . The axial load from the  
140 superstructure induces additional near-field porewater pressure,  $u_{xs,nf}$ , that may be either positive  
141 or negative changes superposed onto  $u_{xs,ff}$ .

142 Immediately after the earthquake and the presence of considerable axial loads, two possible  
143 pile failure mechanisms are anticipated to accompany the development of full liquefaction in  
144 level ground. Slender piles could be subjected to buckling instability if sufficient length of the  
145 pile becomes unsupported by forming a plastic hinge. The other failure mechanism would be an  
146 excessive pile settlement due to the loss of all or part of the shaft resistance and having most of  
147 the axial load carried by the pile tip. Therefore, designers always look for a firm and non-  
148 liquefiable soil deposit (stiff clay, dense sand or rock) in which the pile tip is embedded in order  
149 to reduce any excessive pile settlement (i.e. bearing failure). In the case of having the pile tip  
150 embedded into a liquefiable soil, soil improvement such as soil grouting needs to be considered.  
151 This paper studies the behavior of pile under axial load where a significant length of the pile  
152 penetrates a sand layer(s) with limited liquefaction and the pile tip is embedded in non-  
153 liquefiable soil layer (dense sand or clay) where the pile is still subjected to excessive settlement

154 due to the degradation in sand strength. Settlement will continue until sufficient base capacity  
155 and shaft friction is mobilized to bring the axial load on the pile into equilibrium.

156

### 157 **Load transfer–settlement model (t-z) of sands (no liquefaction)**

158 The methodology presented models the soil around the pile/shaft segment ( $H_s$ ) at depth  $x$  as  
159 soil slices (1, 2, 3 ...m+n) that deform vertically as shown in Figs. 3a and 3b.  $H_s$  can be assumed  
160 equal to the pile diameter ( $D$ ). The shear stress/strain caused by the shaft settlement ( $z$ ) at a  
161 particular depth gradually decreases along the radial distance ( $r$ ) from the pile wall. As seen in  
162 Fig. 3c, the shear stress ( $\tau$ ), settlement  $z$  (i.e. soil shear strain  $\gamma$ ) experience their largest values  
163 ( $\tau_o$ ,  $z_o$  and  $\gamma_o$ ) for a particular load increment at the soil-pile interface where  $r = r_o$ . Kraft et al.  
164 (1981) showed that the actual radial degradation of shear stress and displacement in sand vicinity  
165 around the pile take a parabolic decreasing pattern. The suggested model assumes a nonlinear  
166 parabolic degradation for the soil vertical displacement ( $z$ ) versus the radial distance ( $r$ ).

167

$$z = z_o \left( \frac{r_o}{r} \right)^2 \quad (4)$$

168 Where  $r$  is the radial distance of the point of question, and  $z = z_o$  at  $r = r_o$ . The pattern of  
169 radial variation of soil vertical displacement (in Eqn. 4) is assumed based on the experimental  
170 data observed by Robinsky and Morrison (1964) and the analysis presented by Seo et al. (2008)  
171 and Chow (2007), which is also in agreement with soil displacement nonlinear degradation  
172 pattern obtained from the Finite Element (FE) Program (PLAXIS) using the hardening soil  
173 model with soil's stiffness  $E_{50}$  of 42000 kN/m<sup>2</sup> (Fig. 4). However, the experimental data (i.e.  
174 Eqn. 1) displays rapid degradation for soil displacement compared to the FE method results.



175 Isotropic conditions are assumed in sands after pile installation and horizontal (confining)  
 176 stress is equal to the vertical effective overburden,  $\bar{\sigma}_w$  (i.e. lateral earth pressure coefficient  $K =$   
 177  $1$  and  $\bar{\sigma}_{3c} = \bar{\sigma}_w$  before loading), as shown in Fig. 5. The shear strain associated to soil vertical  
 178 displacement in a sand slice  $i$  between  $r_i$  and  $r_{i+1}$  (Fig. 3b) is determined as

$$179 \quad \gamma_i = \frac{z_i - z_{i+1}}{r_{i+1} - r_i} = \frac{\Delta z_i}{\Delta r_i} \quad (5)$$

180  $\Delta r_i$  has smaller values close to the pile wall that increase away from the pile (Fig. 3a). The  
 181 pile axial load is increasing gradually (incrementally) to produce larger shear stress ( $\tau_o$ ) and  
 182 strain at the soil-pile interface (Fig. 5). The pile settlement at depth ( $x$ ) is accompanied by  $\tau_o$  at  
 183 the soil-pile interface and Mohr circle of a radius  $\tau_o$  and confining pressure  $\bar{\sigma}_3$ .

184 As shown in Fig. 5, the progress in the axial load produces larger Mohr circles with larger  
 185 values of  $\tau_o$  and decreasing values for  $\bar{\sigma}_3$  till  $\tau_o = \tau_{max}$  when the mobilized friction angle ( $\phi_m$ ) in  
 186 the sand becomes equal to the soil-pile friction angle ( $\delta$ ). Figure 3c demonstrates the  
 187 degradation of shear stress at the soil-pile interface  $\tau_o$  (caused by pile settlement  $z$ ) with radial  
 188 distance  $r$  till  $\tau$  and  $z$  become equal to zero at a large value of  $r$ .

189 The constitutive model for drained soil presented by Ashour et al. (1998) (Fig. 6) is employed  
 190 to determine the associated normal and shear strains  $\varepsilon$  and  $\gamma$ , respectively.

$$191 \quad \gamma = \varepsilon (1 + \nu) \quad (6)$$

$$192 \quad SL = \frac{\sigma_d}{\sigma_{d^*}} = \frac{2\tau}{\sigma_{d^*}} \quad (7)$$

193 The Poisson's ratio  $\nu$  is assumed to change from 0.1 to 0.5 as a function of the stress level in  
 194 soil (SL),

195 
$$\nu = 0.1 + 0.4 SL \quad (8)$$

196 and

197 
$$\sigma_{\varphi} = \bar{\sigma}_3 \left[ \tan^2 \left( 45 + \frac{\varphi}{2} \right) - 1 \right] \quad (9)$$

198

199 For a specific pile settlement  $z_o$  at depth  $x$ , a mobilized value of  $\tau_o$  (Fig. 5) is assumed to  
 200 calculate the associated confining pressure  $\bar{\sigma}_3$ ,  $SL$ ,  $\varepsilon_o$  and  $\gamma_o$  at the soil-pile interface using the  
 201 constitutive model in Fig. 6 and Eqns. 6 through 9. The radial degradation in  $\gamma$  (Eqns. 4 and 5) is  
 202 used to sum up the radial developing settlement  $\Delta z_i$  in each soil slice where  $z_o = \Sigma \Delta z_i$ . It should  
 203 be noticed that  $\bar{\sigma}_3$  and  $\tau$  vary for each slice due to the radial degradation of  $\tau_o$ .  $\tau_o$  is adjusted for  
 204 the pile segment in question till calculated  $z_o$  converges properly to  $z_o$  of the pile segment  
 205 obtained from the global iterative stability analysis of the pile side and tip resistance model  
 206 shown in Fig. 7.

207 Figure 8 presents the radial variation of shear stress and strain and pile segment displacement  
 208 at 6 m depth below ground surface for a 0.305-m diameter steel pipe pile embedded 15 m into  
 209 medium dense sand (angle of internal friction  $\varphi = 35$ , effective unit weight  $\bar{\gamma} = 9 \text{ kN/m}^3$ ). The  
 210 shear stress/strain and displacement are also calculated at depth 6m below the ground surface for  
 211 the same axial pile-head load ( $Q = 222 \text{ kN}$ ).

212 Figure 9 also shows the shear modulus degradation curve ( $G/G_i$  vs. shear strain) obtained  
 213 from the utilized soil model where  $G$  is calculated as a function of varying values of  $E$  and  $\nu$  at  
 214 the soil-pile interface.

215 
$$G = \frac{E}{2(1 + \nu)} \quad (10)$$

216 In comparison with the ultimate side frictional resistance ( $f_s$ ) obtained from the MTD method  
217 (Jardine and Chow 1996 and Randolph 2003), Fig. 10 reflects the proposed technique capability  
218 of predicting the nonlinear variation of the mobilized  $f_s$  along the pile length under progressing  
219 pile-head axial load ( $Q$ ) in association with the pile tip resistance ( $Q_p$ ). The 1-m diameter open  
220 ended steel pipe pile is embedded 40 m in medium dense sand with  $\phi = 35$  and  $\bar{\gamma} = 11$  kPa. The  
221 MTD method presented in Fig. 10 is derived from the Imperial College field studies and  
222 database.

223

#### 224 **Pile tip (point) resistance and settlement ( $Q_p - z_p$ ) in sand**

225 It is evident that the associated pile tip resistance manipulates the side resistance of the pile  
226 shaft. As presented in the analysis procedure, the pile tip resistance should be assumed at the  
227 first step. As a result, the shear resistance and displacement of the upper segments of the pile can  
228 be computed based on the assumed pile tip movement. This indicates the need for a practical  
229 technique that allows the assessment of the pile tip load-displacement relationship under a  
230 mobilized or developing state. It should be emphasized that the presented procedure has the  
231 advantage of utilizing the same stress-strain model of sand (Fig. 6) to determine the mobilized  
232 resistance and associated settlement at the pile tip and along the side of the pile.

233 In association with the pile side shear resistance model presented in this study, the approach  
234 established by Elfass (2001) is employed to compute the pile tip load-settlement in sand. The  
235 failure mechanism model assumes four failure zones represented by four Mohr circles, as shown  
236 in Fig. 11. This mechanism yields the bearing capacity ( $q$ ) and its relationship with the  
237 deviatoric stress ( $\sigma_d$ ) of the last (fourth Mohr circle) as shown in Fig 11.

238

$$\sigma_d = 0.6 q \quad (11)$$

239 The pile tip resistance ( $Q_p$ ) is given as,

$$240 \quad Q_p = q A_{base} = \frac{\sigma_d}{0.6} A_{base} \quad (12)$$

241 where  $A_{base}$  is the cross sectional area of the pile tip.

242 As seen in Fig. 11, the Mohr Columb strength envelope is nonlinear and requires the  
 243 evaluation of the secant angle of the fourth circle ( $\phi_{IV}$ ) tangent to the curvilinear envelope. The  
 244 angle of the secant line tangent to first circle ( $\phi_I$ ) at effective overburden pressure can be  
 245 obtained from the field blow data count (SPT test) or a laboratory triaxial test at approximately  
 246 100 kPa (1 tsf) confining pressure. Due to the increase in the confining pressure ( $\bar{\sigma}_3$ ) from one  
 247 circle to the next, the friction angle ( $\phi$ ) decreases from  $\phi_I$  at  $(\bar{\sigma}_3)_I$  to  $\phi_{IV}$  at  $(\bar{\sigma}_3)_{IV}$  assuming a  
 248 value for  $\Delta\phi$  where

$$249 \quad \phi_{IV} = \phi_I - \Delta\phi \quad (13)$$

250 Based on the following Bolton (1986) relationship modified by Elfass (2001) as shown in Fig.  
 251 12

$$252 \quad \phi_{peak} = \phi_{min} + \phi_{diff} \quad (14)$$

$$253 \quad \phi_{diff} = 3I_R = 3D_R \left\{ 10 - \ln \left[ \left( \frac{2 + \tan^2(45 + \phi/2)}{3} \right) \frac{\bar{\sigma}_3}{\bar{\sigma}_3} \right] \right\} - 1 \quad (15)$$

254  $\bar{\sigma}_3$  is in kPa and  $\phi_{min}$  is the lowest friction angle that  $\phi$  may reach at high confining pressure,  
 255 and  $D_r$  is used as decimal value. Knowing the sand relative density ( $D_r$ ) and associated friction  
 256 angle under original confining pressure ( $\bar{\sigma}_3 = \bar{\sigma}_{vo}$ ), Eqn. 15 can be used to calculate the  
 257 reduction in the friction angle  $\Delta\phi$  due to the increase of the confining pressure from  $\bar{\sigma}_{vo}$  to  
 258  $(\bar{\sigma}_3)_{IV}$  and the associated decrease of the friction angle from  $\phi_I$  to  $\phi_{IV}$ . Assume a reduction ( $\Delta\phi$ )

259 = 3 or 4 degrees) in the sand friction angle at  $(\bar{\sigma}_3 = \bar{\sigma}_{w0})$  due to the increase in the confining  
 260 pressure from  $\bar{\sigma}_{w0}$  to  $(\bar{\sigma}_3)_{IV}$ , as seen in Fig. 12. Therefore,

$$261 \quad \Delta\varphi = (\varphi_{diff})_I - (\varphi_{diff})_{IV} \quad (16)$$

262 But the friction angle  $\varphi_{IV}$  associated with  $(\bar{\sigma}_3)_{IV}$  can be also calculated as

$$263 \quad \varphi_{IV} = \varphi_I - \Delta\varphi \log \frac{(\bar{\sigma}_3)_{IV}}{\bar{\sigma}_{w0}} \quad (17)$$

264 Compare the assumed value of  $\varphi_{IV}$  with the value obtained in Eqn. 13. If they are different,  
 265 adjust for new value and repeat the process (Eqn. 13 through 17) until the value of  $\varphi_{IV}$  converges  
 266 and the difference in  $\Delta\varphi$  calculated yields to the targeted tolerance.

267 Using the deviatoric stress ( $\sigma_d$ ) of the fourth circle,

$$268 \quad \sigma_{d4} = (\bar{\sigma}_3)_{IV} \left( \tan^2(45 + \varphi_{IV}/2) - 1 \right) \quad (18)$$

269 Where

$$270 \quad (\bar{\sigma}_3)_{IV} = \bar{\sigma}_{w0} + q - \sigma_d = \bar{\sigma}_{w0} + 0.4q \quad (19)$$

271 The current stress level (SL) in soil (Zone 4 below pile tip) is evaluated as

$$272 \quad SL = \frac{\tan^2(45 + \varphi_m/2) - 1}{\tan^2(45 + \varphi_{IV}/2) - 1} = \frac{\sigma_d}{\sigma_{d4}} \quad ; \quad \sigma_d = SL \sigma_{d4} \quad (20)$$

273 Where

$$274 \quad \varphi_m = \sin^{-1} \left( \frac{\sigma_d/2}{(\bar{\sigma}_3)_{IV} + \sigma_d/2} \right) \quad (21)$$

275

276 **File tip settlement**

277 The pile tip displacement in sand can be determined based on the drained stress-strain  
278 relationship presented in Fig. 6 where the soils strain ( $\varepsilon$ ) below the pile tip is evaluated according  
279 to the model shown in Fig. 13.

280 For a constant Young's modulus ( $E$ ) with depth, the strain or  $\varepsilon_1$  profile has the same shape as  
281 the elastic ( $\Delta\sigma_1 - \Delta\sigma_3$ ) variation or Schmertmann's  $I_z$  factor (Schmertmann 1970, Schmertmann et  
282 al. 1979 and Norris 1986). Taking  $\varepsilon_1$  at depth  $r_0$  below the pile tip (the peak of the  $I_z$  curve), the  
283 pile tip displacement ( $z_p$ ) is a function of the area of the triangular variation (Fig. 13).

$$284 \quad z_p = 2 \varepsilon r_0 \quad (22)$$

285 where  $r_0$  is the radius of the pile tip. Dealing with different values for pile tip resistance (Eqn.  
286 12), the associated deviatoric stress (Eqn. 11), stress level (Eqn. 19) and principal strain ( $\varepsilon$ ) (Fig.  
287 6) can be used to assess the tip movement in order to construct the pile tip load-settlement ( $Q_p -$   
288  $z_p$ ) curve.

### 290 **Constitutive modeling of saturated sands with limited liquefaction**

291 The undrained stress-strain model of sands with limited liquefaction (i.e.  $r_u < 1$ ) as developed  
292 by Ashour et al. (2009) is employed in the current analysis. As presented experimentally by  
293 several researchers, the undrained response of sands with limited liquefaction under monotonic  
294 loading may experience initial (restrained) contractive behavior that is then followed by dilative  
295 behavior in response to a drop in the confining pressure ( $\bar{\sigma}_3 > 0$ ) (Fig. 2).

296 The assessed value of  $r_u$  in the free-field (i.e.  $\Delta u_c$ ) induced by the earthquake is obtained using  
297 the procedures presented by Idriss and Boulanger (2004) for calculating the magnitude scaling  
298 factor and liquefaction potential based on SPT-N. Under monotonic loading, the undrained  
299 behavior of sand with limited liquefaction induced by cyclic loading (i.e.  $r_u < 1$  and  $\bar{\sigma}_3 = \bar{\sigma}_{3cc} >$

0 at point r) reflects initial restrained contractive behavior followed by dilative response (at point  
 s) whereby its effective stress path ( $\bar{p} = \bar{\sigma}_3 + \sigma_d / 2$ ) reaches the failure line and thereafter  
 marches up the failure line due to restrained dilative (Fig. 14b).

The technique presented by Ashour et al. (2009) allows assessment of the undrained stress-  
 strain behavior of sand with limited liquefaction based on drained test behavior. Such  
 assessment requires only basic properties of the sand such as its relative density [or  $(N_1)_{60}$ ],  
 effective angle of internal friction ( $\phi$ ), roundness of the sand grains ( $\rho$ ), drained axial strain at  
 50% stress level ( $\varepsilon_{50}$ ), and confining pressure ( $\bar{\sigma}_3$ ).  $\varepsilon_{50}$  can be obtained from the conventional  
 triaxial test or the chart developed by Norris (1986) and also presented by Ashour et al. (1998)  
 which is a function of the sand uniformity coefficient ( $C_u$ ) and void ratio ( $e$ ).

The experimental basis of the utilized technique employs a series of drained tests, with  
 volume change measurements, on samples isotropically consolidated to the same confining  
 pressure,  $\bar{\sigma}_{3c}$ , and void ratio,  $e_c$ , to which the undrained test is to be subjected. However, the  
 drained tests are rebounded to different lower values of effective confining pressure,  $\bar{\sigma}_3$ , before  
 being sheared. Such a technique allows the assessment of undrained behavior of sand  
 isotropically consolidated to  $\bar{\sigma}_{3c}$  that is subjected to compressive monotonic loading (Norris et  
 al. 1997 and Ashour and Norris 1999). During an isotropically consolidated undrained (ICU) test,  
 the application of a deviatoric stress,  $\sigma_d$ , in compressive monotonic loading causes additional  
 PWP,  $\Delta u_d$ , that results in lower effective confining pressure,  $\bar{\sigma}_3$ , i.e.

$$\bar{\sigma}_3 = \bar{\sigma}_{3c} - \Delta u_d \quad (\text{No cyclic loading}) \quad (23)$$

And an associated isotropic expansive volumetric strain,  $\varepsilon_{v,iso}$ , the same as recorded in an  
 isotropically rebounded drained triaxial test (prior to shear loading). However, in the undrained

322 test, the volumetric change or volumetric strain must be zero. Therefore, there must be a  
 323 compressive volumetric strain component,  $\varepsilon_{v, \text{shear}}$ , due to the deviatoric stress,  $\sigma_d$ . This shear  
 324 induced volumetric strain,  $\varepsilon_{v, \text{shear}}$ , must be equal and opposite to  $\varepsilon_{v, \text{iso}}$ , so that the total volumetric  
 325 strain,  $\varepsilon_v = \varepsilon_{v, \text{iso}} + \varepsilon_{v, \text{shear}}$ , in undrained response is zero, or  $\varepsilon_{v, \text{shear}} = -\varepsilon_{v, \text{iso}}$ . In the isotropically  
 326 rebounded drained shear test,  $\varepsilon_{v, \text{iso}}$  and then  $\varepsilon_{v, \text{shear}}$  (to match  $\varepsilon_{v, \text{iso}}$ ) are obtained separately and  
 327 sequentially in the undrained test, they occur simultaneously.

328 Ashour et al. (2009) extended the technique to incorporate the excess PWP induced by cyclic  
 329 loading ( $\Delta u_c$ ) and its influence on the undrained behavior of sands under the compressive  
 330 monotonic loading ( $\Delta u_d$ ) when the sand is subjected to limited liquefaction.

331 
$$\bar{\sigma}_3 = \bar{\sigma}_{3c} - u_{rs} = \bar{\sigma}_{3c} - \Delta u_c - \Delta u_d = \bar{\sigma}_{3cc} - \Delta u_d \quad (\bar{\sigma}_{3cc} > 0 \text{ and } r_u < 1) \quad (24)$$

332 where  $\bar{\sigma}_{3cc}$  is the post-cyclic effective confining stress and  $\bar{\sigma}_{3cc} = \bar{\sigma}_{3c} - \Delta u_c$ . Sand is subjected  
 333 to limited liquefaction if  $\Delta u_c < \bar{\sigma}_{3c}$  (Fig. 14a and 14b). In order to establish undrained behavior  
 334 from drained response, it is necessary to characterize the drained volume change due to shear of  
 335 Fig. 14c that must be equal and opposite to the isotropic volume change due to the change in  
 336 effective confining pressure ( $\bar{\sigma}_3$ ) indicated in Fig. 14a.

337 The above procedure can be applied as long  $r_u$  induced by cyclic loading is less than 1 and the  
 338 residual confining pressure ( $\bar{\sigma}_3$ ) is greater than zero at point r (soil with limited liquefaction).  
 339 Under monotonic loading, sand with limited liquefaction may experience a contractive response  
 340 associated with a reduction in  $\bar{\sigma}_3$  (to point s in Figs. 14.a and 14b) to reach the lowest value of  
 341  $\bar{\sigma}_3$  (point 6 in Figs. 14b and 14c), and then rebound (dilate) with increasing  $\bar{\sigma}_3$  until  $\bar{\sigma}_3 =$   
 342  $\bar{\sigma}_{3cc}$  again (point  $\bar{r}$  in Figs. 14a and 14b). Sand continues to dilate beyond  $\bar{\sigma}_{3cc}$  ( $\bar{r} - \bar{s}$ , Fig.  
 343 14a) with increasing  $\bar{\sigma}_3$  and monotonically induced porewater pressure ( $\Delta u_d$ ). When  $\bar{\sigma}_3 <$



344  $\bar{\sigma}_{3cc}$ ,  $\varepsilon_{v,iso}$  rebounds to point s and then recompresses. This is associated with an equal net  
 345 compressive  $\varepsilon_{v,shear}$ . However, when  $\bar{\sigma}_3 > \bar{\sigma}_{3cc}$ ,  $\varepsilon_{v,iso}$  moves from  $\bar{r}$  to  $\bar{s}$  and an equal dilative  
 346  $\varepsilon_{v,shear}$  develops simultaneously.

347 The undrained shear strength and deviatoric stress of partially liquefied sand at any particular  
 348 increment of loading is a function of the associated effective confining stress  $\bar{\sigma}_3$  and stress level  
 349 (SL).

$$350 \quad \tau = \sigma_d / 2 = \frac{SL \bar{\sigma}_3}{2} \left[ \tan^2 \left( 45 + \frac{\phi}{2} \right) - 1 \right] \quad (25)$$

351 The varying SL is a function of the drained  $\varepsilon_1$ ,  $\varepsilon_{50}$ , and current  $\bar{\sigma}_3$  and calculated as presented  
 352 in Fig. 6. The presented work focuses on the undrained behavior of liquefiable sands pre- and  
 353 post-peak where contractive and dilative behavior continues without reaching the steady state  
 354 deformation ( $d\varepsilon_v / d\varepsilon_1 = 0$ ) at very large soil strain.

355 Figure 15 shows a comparison between computed and measured response (undrained stress  
 356 strain) of Fraser River and Ottawa sands (Vaid and Thomas 1995 and Castro 1969). Both sands  
 357 were subjected to cyclic loading that developed free-field PWP with  $r_u < 1$  before the monotonic  
 358 load is applied. Input data used in the analysis is presented in the figure.

359

### 360 **Load transfer–settlement modeling (t-z curve) in sand with limited liquefaction**

361 Experiments by Robinsky and Morrison (1964) showed that the soil displacement pattern  
 362 adjacent to a vertically loaded pile within a zone of  $r_o/2$  wide adjacent to the pile accounts for  
 363 75% of the shear displacement ( $z$ ) as shown in Fig. 4. An average soil strain  $\gamma_{ave}$  can be  
 364 expressed as

365 
$$\gamma_{ave} = \frac{0.75 z}{r_o / 2} = \frac{1.5 z}{r_o} \quad (26)$$

366  $\gamma_{ave}$  is employed in the current study. The undrained normal strain in the sand is expressed as

367 
$$\varepsilon_1 = \frac{\gamma_{ave}}{(1 + \nu)} = \frac{\gamma_{ave}}{1.5} \quad (27)$$

368  $\varepsilon_1$  is used in the undrained constitutive model of sand to determine the associated shear stress  
 369 ( $\tau_s = \sigma_d/2$ ) at the soil-pile interface. The full undrained stress-strain relationship of the  
 370 liquefiable sand at any depth is governed by  $M$  and  $a_{max}$  of the anticipated earthquake and  
 371 resulting  $\bar{\sigma}_{3cc}$  in the free-field.

372 Figure 16 displays the mechanism of the simultaneous variation of PWP and associated  
 373 undrained shear stress/strain in partially liquefied sand. Due to cyclic loading,  $u_{xs,ff}$  (i.e.  $\Delta u_c$ ) is  
 374 generated and  $\bar{\sigma}_{3c}$  (i.e.  $\bar{\sigma}_{v0}$ ) drops to  $\bar{\sigma}_{3cc}$  at point 1. As a result of axial loading, the  
 375 progressing soil-pile displacement ( $z$ ) in the critical zone around the pile develops  $\gamma$  and  $\tau_s$   
 376 (points 1, 2, 3...). The increase of  $\gamma$  (due to pile settlement) in the near-field generates additional  
 377  $u_{xs,nf}$  (i.e.  $\Delta u_d$ ) and reduces the confining pressure  $\bar{\sigma}_3$  between points 1 and 3 and associated  
 378 Mohr circles, as seen in Fig. 16a. Mohr circle of the effective stress in sand in the near-field is  
 379 adjusted for the change of the excess water pressure ( $\Delta u_d$ ) and confining pressure  $\bar{\sigma}_3$  induced by  
 380 soil shearing in order to satisfy the equilibrium among  $\gamma$ ,  $\tau_s$ ,  $\Delta u_d$  and  $\bar{\sigma}_3$  (points/circles 1 to 3).  
 381 As shown in Fig. 16a and 16b,  $\Delta u_d$  continues to build up with increasing  $\gamma$ , and decreasing  $\bar{\sigma}_3$   
 382 along with slower increase of SL which is approaching its maximum unit value (SL = 1).  
 383 Therefore, the sand undrained shear strength  $\tau_s$  suffers a drop in its values (post-peak) between  
 384 points 3 and 4.

385 Because of the dilative behavior of sand,  $\Delta u_d$  begins to decrease after reaching its largest  
386 value at point 4 that marks the lowest value of  $\bar{\sigma}_3$  and  $\tau_s$ .  $\Delta u_d$  continues to drop beyond point 4  
387 with the progress of  $\gamma$  resulting in a rebound in  $\bar{\sigma}_3$  and  $\tau_s$  as demonstrated by Mohr circles of  
388 points 4 through 6 where  $\Delta u_d$  becomes zero.

389  
390 The analysis presented in this paper utilizes a combination of a number of semi-empirical  
391 approaches 1) development of PWP in the free-field (Idriss and Boulanger 2004); 2) pile tip  
392 resistance and settlement in sands (Elfass 2001 and Schnertmann et al. 1979); 3) the constitutive  
393 model of drained sands presented by Ashour et al. (1998) to determine the pile side resistance in  
394 non-liquefied sands; 4) the undrained stress-strain model of partially liquefied sands (i.e. PWP in  
395 the near-field) established by Ashour et al. 2009 to calculate the pile side resistance in liquefied  
396 sands. The previously mentioned techniques are combined in the procedure presented in Fig. 7  
397 as described by Coyle and Reese (1966). The Flowchart presented in Fig. 17 provides step-by-  
398 step description for the calculation process as compiled in the computer code which is written in  
399 FORTRAN. It should be mentioned that the abovementioned process is applied at each pile  
400 segment (Fig. 7) to determine  $\tau_s$  ( $\tau_s = f_s$ ) associated to each pile segment displacement  $z$ .

#### 401 402 **Variation of PWP, confinement pressure, and shear stress/strain along the pile**

403 A 0.305-m diameter steel pipe pile is driven into the soil profile shown in Table 1. The tip of  
404 the 15-m long pile is embedded into a sand layer overlain by a 10-m deposit of liquefiable  
405 medium dense sand ( $D_r = 50\%$ ). An earthquake with a magnitude  $M = 5.0$  and peak-ground  
406 acceleration  $a_{\max} = 0.15g$  has been utilized to generate  $u_{xs,ff}$  with  $r_u$  less than 1 (i.e. limited  
407 liquefaction). The PWP curves are numbered for advancing pile head axial load ( $Q$ ) increments

408 shown in Table 2. The solid and dashed sets of curves shown in Fig. 18a describe the PWP (i.e.  
409  $r_u$ ) increase and decrease phase into sands around the pile, respectively. Under an axial load  
410 increment and due to the increasing effective soil pressure with depth, it can be seen in Fig. 18a  
411 that the PWP in the upper portion of the sand layer develops (solid curves) faster than deeper  
412 sand. Similar behavior can be also observed via the dashed curves when the PWP is decreasing.

413 Figure 18b presents the variation of soil-shaft friction ( $f_s$  or  $\tau_s$ ) along the pile length under  
414 growing axial load  $Q$ .  $\tau_s$  is determined at the soil-pile interface through the clay, liquefied and  
415 non-liquefied sand layers. The technique presented by Ashour et al. (2009) is used to calculate  $f_s$   
416 in the upper clay layer. The distribution of the axial load resistance ( $Q$ ) along the pile length is  
417 presented in Fig. 18c. Curves 4 through 7 in Figs. 18b and 18c display limited increase in the pile  
418 axial resistance versus larger pile settlement associated with higher levels of  $r_u$ . Larger settlement  
419 with smaller increase in the axial load is attributed to the temporary drop of pile-soil frictional  
420 resistance before it rebounds with the decrease of the PWP (Figs. 18c and 18d). To show the  
421 effect of sand limited liquefaction on pile settlement under the same axial load increment  $Q_T =$   
422 530 kN (increment 7 in Table 2), the pile head maintains settlement of 9 mm (Fig. 18d)  
423 compared to 4 mm with the static (no liquefaction) conditions.

424 For the same soil-pile profile, Figure 19a shows the variation of the PWP in medium dense  
425 sand due to soil-pile displacement ( $z$ ) at different depths using earthquake input data of  $M = 5.0$   
426 and  $a_{\max} = 0.15g$  to induce limited liquefaction into the 10-m thick sand layer ( $r_u < 1$ ) (before pile  
427 loading). The  $r_u$  curves in Fig. 19a demonstrate the influence of the contractive and dilative  
428 behavior of the medium dense sand layer under undrained conditions that is associated with an  
429 increase and then decrease of  $r_u$  with the progress of  $z$  (i.e. soil shear strain). The calculated  
430 undrained  $t$ - $z$  curves at 4, 8 and 12 m deep below the ground surface (Fig. 19b) reflect the

431 influence of the undrained stress-strain curve of liquefied sands (i.e.  $r_u$ ) on the resulting shape of  
432 the t-z curve.

433 In order to show the effect of sand density on the t-z curve, a specific seismic scenario ( $M =$   
434  $5.0$  and  $a_{\max} = 0.1g$ ) has been used with the liquefiable sand layer using three states of sand  
435 relative density for the 10-m thick sand layer presented in Table 1 using different values of  
436 relative density. As seen in Fig. 20, the shape of the t-z at 8 m depth is controlled by the shape  
437 of the undrained stress-strain curve of the sand.  $Dr = 30\%$ ,  $40\%$  and  $50\%$  with  $\epsilon_{50}$  of  $0.8\%$ ,  
438  $0.65\%$  and  $0.55\%$ , respectively, have been used with the 10-m thick liquefiable sand layer  
439 Compared to medium dense sands, it can be seen that the rebound of the t-z curve (i.e. soil  
440 strength) in loose sands ( $Dr = 30\%$ ) is much slower. Such behavior of loose sands justifies the  
441 practice current use of the residual strength of liquefied loose sands.

442 The change of the PWP induced by different seismic events (i.e.  $u_{xs,ff}$  or  $\Delta u_c$ ) before the axial  
443 load is applied would affect the resulting t-z curve. It should be noted that the change of  $a_{\max}$   
444 produces different t-z curves at the same depth into the same soil profile as shown in Fig. 21.  
445 Using  $a_{\max}$  less than  $0.1g$  does not yield significant change in the calculated undrained t-z curve.  
446 The switch from undrained to drained conditions results in a significant effect on the shape and  
447 stiffness of the calculated t-z curve (Fig. 21).

448 The side resistance of the pile ( $Q_s$ ) versus pile head settlement is presented in Fig. 22 by  
449 utilizing different values of  $a_{\max}$  with the same  $M = 5.0$  to generate different initial values of  $r_u$  in  
450 the free-field (i.e. limited liquefaction) before the axial load is applied. The obtained results  
451 exhibit the sensitivity of  $Q_s$  with respect to small variations in the characteristic of the  
452 earthquake. A considerable drop in the pile side resistance can be observed at  $a_{\max} = 0.2g$  due to  
453 the development of full liquefaction. However, less values of  $a_{\max}$  exhibit a drop in  $Q_s$  over the

454 settlement range of  $z = 4 \text{ mm}$  to  $12 \text{ mm}$  (i.e. design range) for  $a_{\max} < 0.2g$ . To substitute for the  
455 drop in  $Q_s$  into the liquefied layer(s), the pile tip and shaft resistance into the non-liquefiable soil  
456 layers would provide more resistance but with additional settlement. Figure 22 shows that  
457 around 100% increase in the pile axial resistance can be considered in a moderate seismic event  
458 ( $a_{\max} = 0.15g$  and  $0.2g$ ) if the soil has been treated in a partially liquefied state instead of being  
459 fully liquefied.

460 During the seismic event the existing pile will be subjected to cycles of loading-unloading  
461 mechanism (rocking) (i.e. tensile-compressive or small and large compressive forces for very  
462 short periods of time). By the end of the rocking scenario and the development of soil  
463 liquefaction (i.e. largest value of  $r_u$ ), the pile goes back to experience the existing static axial load  
464 from the superstructure under new conditions of soil liquefaction. Such a scenario assumes 1) no  
465 changes in the properties of the saturated sands around the pile due to the seismic (undrained  
466 conditions, constant  $Dr$ , no PWP dissipation yet); and 2) the residual shear stress/strain induced  
467 by the end of the cyclic loading and beginning of the monotonic loading (the axial load) is zero  
468 (i.e. no shear bias)

#### 470 **Case study**

471 Model and full-scale load tests of axially loaded pile in sand with limited liquefaction are very  
472 limited. Most tests focus on the combination of lateral and axial loads in fully liquefied soils ( $r_u$   
473  $= 1$ ) that could damage the pile under bending moment. The full-scale load test performed by  
474 Strand (2008) to study the effect of downdrag on piles in liquefied soils is used in its initial phase  
475 to study the behavior of axially loaded piles in partially liquefied soils. As observed from  
476 reported test data,  $r_u$  induced by controlled blasting into the liquefiable sand layer varied with

477 depth (6.7 m to 16.8 m below ground) from 0.9 to 0.1 just immediately after the blast. Table 3  
478 shows the soil profile at the test site 2 and  $D_r$  as provided by Strand (2008) based on the CPT  
479 data and modified second layer (clay). It should be noted that the PWP dissipated with time and  
480 the test results collected immediately after the blast would be employed in the current  
481 comparison. As reported by Strand (2008), Piezometers were installed 0.75 m from the center of  
482 the pile at depths of 6.7, 8.4, 10.7, 12.8 and 16.8 m below the ground. Strain gauges were  
483 installed on the pile every 1.5 m down to 17 m below ground.

484 A static (pre-blast) load test was carried out one day after the 0.324-m diameter closed-end  
485 steel pipe pile was driven approximately 21 m below the ground surface. Figure 23 shows a  
486 comparison of measured and computed pile-head load settlement curve collected from the static  
487 load test. Good agreement between measured and computed distribution of the axial load carried  
488 by the pile shaft down to 17 m below the ground surface is presented in Fig. 24. Significant  
489 axial resistance through the second soil layer can be observed in Fig. 24. Compared to other soil  
490 layers, the CPT data of the second soil layer showed considerably higher values of friction ratio  
491 ( $R_f$ ) and less  $q_c$ . Therefore, the second layer is treated in the current analysis as clay layer. The  
492 comparison presented in Fig. 25 shows good agreement between measured and calculated t-z  
493 curves. Table 3 also presents the values of  $\epsilon_{50}$  employed in current analysis. Large depth interval  
494 (3.6 m – 15.75 m) is reported with the lowest measured t-z curve (Fig. 25), which is in  
495 reasonable agreement with the t-z curve computed at the bottom of the first soil layer. It should  
496 be noted that dealing with the second soil layer as clay provides a t-z curve (at 3 m depth) in a  
497 very good agreement with the measured one (Fig. 25). Treating the second soil layer as clay  
498 yields good agreement with the axial load resistance along the pile in the pre- and post-limited  
499 liquefaction case (Figs. 24 and 26). The proposed technique provides the PWP distribution at the

500 soil-pile interface into the liquefiable soil deposit before and after the axial load (365 kN) is  
501 applied at the pile head (Fig. 27). The results presented in Fig. 27 consider undrained conditions  
502 in the surrounding soil during under the axial loading test.

503

#### 504 **Summary and Conclusions**

505 The paper presents an approach to predict the behavior of axially loaded piles in partially  
506 liquefied and non-liquefied sands. The proposed approach allows the assessment of the load  
507 transfer ( $t-z$ ) and pile head/tip load–settlement curves in sands under drained and undrained  
508 conditions. Drained and undrained stress-strain relationships are employed to calculate the pile  
509 mobilized side resistance along with the  $t-z$  curve with the consideration of developing PWP in  
510 surrounding sands. Significant increase in the pile settlement would be anticipated due to the  
511 development of partial liquefaction in medium dense sands. The current analysis accounts for  
512 the PWP induced by a seismic event and the monotonic axial load applied at the pile head. Pile  
513 tip and side resistance are combined in a mobilized fashion to exhibit good comparisons with  
514 available field test data using basic pile and soil properties (pile’s dimensions and stiffness, and  
515 sand’s friction angle, relative density, effective unit weight and  $\epsilon_{50}$  in addition to  $M$  and  $a_{\max}$  of  
516 the earthquake in case of liquefaction potential).

517 The following conclusions are drawn from the technique presented and related results:

- 518 1. The consideration of limited liquefaction in medium dense sand ( $D_r = 35\% - 65\%$ ) in the  
519 vicinity of axially loaded pile could result in significant cost savings and improvement in  
520 the pile axial resistance.



- 521 2. The assessment of the full pile-head load – settlement curve in partially liquefied soils  
522 allows the designer to capture a representative value of the pile settlement under exiting  
523 axial load and associated PWP.
- 524 3. The shape of t-z curve in partially liquefied soil is highly influenced by the PWP  
525 variation. Therefore, the empirical plot of the t-z curve in liquefiable soil using a  
526 reduction factor (a multiplier) could result in unsafe or very conservative design.
- 527 4. The wide variation of the medium dense sand properties ( $D_r = 35\% - 65\%$ ) should be  
528 accounted in the analysis of axially loaded piles in liquefied and non-liquefied sands.  
529 Consequently, varying pile responses can be determined for the same category of sands  
530 (medium dense).

531

### 532 **Acknowledgment**

533 This research was sponsored by the Alabama Department of Transportation (ALDOT Project  
534 930-769)

535

### 536 **References**

537 American Association of State Highway and Transportation Officials (AASHTO) (2007).

538 “AASHTO LRFD Bridge Design Specifications.” Appendix 10.

539 Altaee, A., Evigin, E., and Fellenius, B.H. (1992). “Axial load transfer for piles in sand, II.

540 Numerical analysis.” *Can. Geotech. J.*, 29(1), 21–29.

541 Alawneh, A.S., Nusier, O., Malkawi, A.I.H., and Al-Kateeb, M. (2001). “Axial compressive

542 capacity of driven piles in sand: A method including post-driving residual stresses.” *Can.*

543 *Geotech. J.*, 38(2), 364–377.

544 Ashour, M., and Ardalán, H. (2011). "Piles in Fully Liquefied Soils with Lateral Spread."  
545 Journal of Computers and Geotechnics, 38(5), 821-833.

546 Ashour, M. and Norris, G.M. (1999). "Liquefaction and undrained response evaluation of sands  
547 from drained formulation." J. Geotech. Geoenviron. Eng., 125(8), 649-658.

548 Ashour, M., Norris, G. M., and Tung Nguyen (2009). "Assessment of the undrained response of  
549 sands under limited and complete liquefaction." J. Geotech. Geoenviron. Eng., 135(11), 1772-  
550 1776.

551 Ashour, M., and Norris, G., and Pilling, P. (1998). "Lateral loading of a pile in layered soil using  
552 the strain wedge model." J. Geotech. Geoenviron. Eng., 124(4), 303-315.

553 American Petroleum Institute. Recommended Practice for Planning, Designing and Constructing  
554 Fixed Offshore Platforms (1993). "Load and resistance factor design." API Recommended  
555 practice 2A-LRFD, 1st edition.

556 Bengt, H. Fellenius, and Timothy, C. Siegel. (2008). "Pile drag load and downdrag in a  
557 liquefaction event." J. Geotech. Geoenviron. Eng., 134(9), 1412-1416.

558 Bhattacharya, S., Bolton, M.D., and Madabhushi, S.P.G. (2005). "A Reconsideration of the  
559 safety of the piled bridge foundations in liquefiable soils." Soils Found., 45(4), 13-25.

560 Bolton, M.D. (1986). "The strength and dilatancy of sand." Géotechnique, 36 (1), 65-78.

561 Castro, G. (1969). "Liquefaction of sands." Ph.D. thesis, Division of engineering and applied  
562 physics, Harvard University, Cambridge.

563 Chow, Y.K. (1986). "Analysis of vertically loaded pile groups." Int. J. Numer. Anal. Methods  
564 Geomech., 10, 59-72.

565 Chow, H.S.W. (2007). "Analysis of piled-raft foundations with piles of different lengths and  
566 diameters." PhD thesis, University of Sydney.

567 Coyle, H.M., and Costello, R.R. (1981). "New design correlations for piles in sand." J. Geotech.  
568 Engrg. Div., 107(7), 965-986.

569 Coyle, H. M. and Reese, L. C. (1966). "Load Transfer for axially loaded piles in clay." Journal  
570 of Soil Mechanics and Foundations Division, 92(SM2), 1-25.

571 Elfass, S. (2001). "A new approach for estimating the axial capacity of driven piles in sand up to  
572 true soil failure." Ph.D. thesis, University of Nevada, Reno.

573 Fellenius, B.H. (1999). "Basics of foundation design. 2nd expanded edition." BiTech Publishers,  
574 Vancouver, 140 p.

575 Fellenius, B.H. and Siegel, T.C. (2008). "Pile drag load and downdrag in a liquefaction event"  
576 Journal of Geotechnical and Geoenvironmental Engineering, 134(9), 1412-1416.

577 Haldar, S. and Babu, G.L.S. (2010). "failure mechanisms of pile foundations in liquefiable soil:  
578 parametric study." International Journal of Geomechanics, 10(2), 74-84.

579 Hoit, M., McVay, M., and Hays, C. (2007). "FB-MultiPier version 4.11 user's manual." Bridge  
580 Software Institute, University of Florida, Gainesville, Florida.

581 Idriss, I. M., and Boulanger, R. W. (2004). "Semi-empirical procedures for evaluating  
582 liquefaction potential during earthquakes." Proc. of the 11th ICSDEE & 3rd ICEGE, 32 – 56.

583 Jardine, R.J., and Chow, F.C. (1996). "New design methods for offshore piles." MTD  
584 Publication, 96/103, London, Marine Technology Directorate, 48.

585 Kraft, L.M., Richard, P.R., and Kagawa, T. (1981). "Theoretical t-z curves." J. Geotech. Engrg.  
586 Div., 107(11), 1543–1561.

587 Maheshwari, B. K. and Sarkar, R. (2011). "Seismic behavior of soil-pile-structure interaction in  
588 liquefiable soils: parametric study," International Journal of Geomechanics, 11(4), 335-347.

589 McVay, M.C., O'Brien, M., Townsend, F.C., Bloomquist, D.G., and Caliendo, J.A. (1989).  
590 "Numerical analysis of vertically loaded pile groups." Proc. of Foundation Engineering  
591 Congress, ASCE, Northwestern University, Edited by FH Kulhawy, New York, 675–690.

592 Norris, G.M. (1986). "Theoretically based BEF laterally loaded pile analysis." Proceedings of  
593 3rd International Conference on Numerical Methods in Offshore Piling, Nantes, France, 361-  
594 386.

595 Norris, G.M., Siddharthan, R., Zafir, Z., and Madhu, R. (1997). "Liquefaction and residual  
596 strength of sands from drained triaxial tests." J. Geotech. Geoenviron. Eng., 123(3), 220-228.

597 Randolph, M.F., and Wroth, C.P. (1978). "Analysis of deformation of vertically loaded piles." J.  
598 Geotech. Engrg. Div., 104(12), 1465–1488.

599 Randolph, M.F. (2003). "43rd Rankine lecture: science and empiricism in pile foundation  
600 design." Géotechnique, 53(9), 785-796.

601 Robinsky, E.I., and Morrison, C.E. (1964). "Sand displacement and compaction around model  
602 friction piles." Can. Geotech. J., 1(2), 81–93.

603 Rollins, K.M., and Strand, S.R. (2006). "Downdrag forces due to liquefaction surrounding a  
604 pile." Proc. of 8th US Natl. Conf. on Earthq. Engrg., San Francisco, CA, 1646.

605 Salgado, R., Seo, H., and Prezzi1, M. (2011). "Variational elastic solution for axially loaded  
606 piles in multilayered soil." International Journal for Numerical and Analytical Methods in  
607 Geomechanics, 35(18), Published online, DOI: 10.1002/nag.1110

608 Schnertmann, J.H. (1970). "Static cone to compute static settlement over sand." J. Geotech.  
609 Engrg. Div., 96(3), 1011–1043.

610 Schnertmann, J.H., Hartman, J.P., and Brown, P.R. (1978). "Improved strain influence factor  
611 diagram." J. Geotech. Engrg. Div., 105(6), 715–726.

612 Seo, H., Irem, Z.Y., and Prezzi, M. (2009). "Assessment of the axial load response of an H pile  
613 driven in multilayered soil." *J. Geotech. Geoenviron. Eng.*, 135(12), 1789-1804.

614 Seo, H., Prezzi, M., and Salgado, R. (2008). "Settlement analysis of axially loaded piles." *Proc.*  
615 *of the 6th Int. Conf. on Case Histories in Geotech. Engrg. and Symposium*, Arlington, VA.

616 Seo H., and Prezzi M. (2007). "Analytical solutions for a vertically loaded pile in multilayered  
617 soil." *Geomechanics and Geoengineering: An International Journal*, 2(1), 51-60.

618 Shanker, K., Basudhar, P.K., and Patra, N.R. (2007). "Buckling of piles under liquefied soil  
619 conditions." *Geotech. Geol. Eng.*, 25(3), 303-313.

620 Sonia, A. , and Desai, C.S. (1987). "Load deformation response of axially loaded piles." *J.*  
621 *Geotech. Engrg.*, 113(12), 1483-1500.

622 Strand, R.S. (2008). "Liquefaction mitigation using vertical composite drains and liquefaction-  
623 induced downdrag on piles: implications for deep foundation design." Ph.D. thesis,  
624 Department of civil and environmental engineering, Brigham young university.

625 Vaid, Y.P., and Thomas, J. (1995). "Liquefaction and post-liquefaction of behavior of sand." *J.*  
626 *Geotech. Eng.*, 121(2), 163-173.

627 Vijayvergiya, V.N. (1977). "Load-movement characteristics of piles." *Proc., Ports 77*  
628 *Conference, ASCE, Long Beach, CA*, 269-286.

629 Zhu, H., and Chang, F. (2002). "Load transfer curves along bored piles considering modulus  
630 degradation." *J. Geotech. Geoenviron. Eng.*, 128(9), 764-74.

631 Yao, W, Liu, Y., and Chen, J. (2012) "characteristics of negative skin friction for superlong piles  
632 under surcharge loading." *International Journal of Geomechanics*, 12(2), 90-97.

633

**Table 1.** Soil profile

| Soil Layer Thick.<br>(m) | Soil Type         | Unit Weight, $\bar{\gamma}$<br>(kN/m <sup>3</sup> ) | $\epsilon_{50}$<br>(%) | $\phi$<br>(degree) | <sup>a</sup> $S_u$<br>(kN/m <sup>2</sup> ) |
|--------------------------|-------------------|-----------------------------------------------------|------------------------|--------------------|--------------------------------------------|
| 2.0                      | Clay              | 16                                                  | 2.0                    | -                  | 20                                         |
| 1.0                      | Clay              | 7                                                   | 2.0                    | -                  | 20                                         |
| 10.0                     | Medium dense sand | 8                                                   | 0.8                    | 33                 | -                                          |
| 5.0                      | Dense sand        | 10                                                  | 0.2                    | 42                 | -                                          |

<sup>a</sup> Undrained shear strength

**Table 2.** Pile head axial load ( $Q_T$ ) increments

| Curve (Load increment) # | 1   | 2   | 3   | 4   | 5   | 6   | 7   | 8   | 9   |
|--------------------------|-----|-----|-----|-----|-----|-----|-----|-----|-----|
| $Q_T$ (kN)               | 130 | 205 | 350 | 400 | 425 | 450 | 530 | 625 | 660 |

RETRACTED

**Table 3.** Soil profile at the test site 2 (After Strand 2008)

| Soil Layer<br>Thick. (m) | Soil Type         | Dr (%)<br>Average | Unit Weight, $\bar{\gamma}$<br>(kN/m <sup>3</sup> ) | $\epsilon_{50}$<br>(%) | $\phi$<br>(degree) | $S_u$<br>(kN/m <sup>2</sup> ) |
|--------------------------|-------------------|-------------------|-----------------------------------------------------|------------------------|--------------------|-------------------------------|
| 2.8                      | Medium dense sand | 60                | 18                                                  | 0.6                    | 34                 | -                             |
| 1.5                      | Stiff clay*       | 70                | 8                                                   | 0.5                    | 28                 | 120                           |
| 8.5                      | Medium dense sand | 35                | 7.5                                                 | 1.0                    | 31                 | -                             |
| 6.5                      | Medium dense sand | 50                | 8                                                   | 0.8                    | 33                 | -                             |
| 3.0                      | Silt/clayey silt  | 50                | 8                                                   | 2.0                    | 24                 | 20                            |

\* Reported as sand silt/silt with the shown Dr and modified in current study to stiff clay



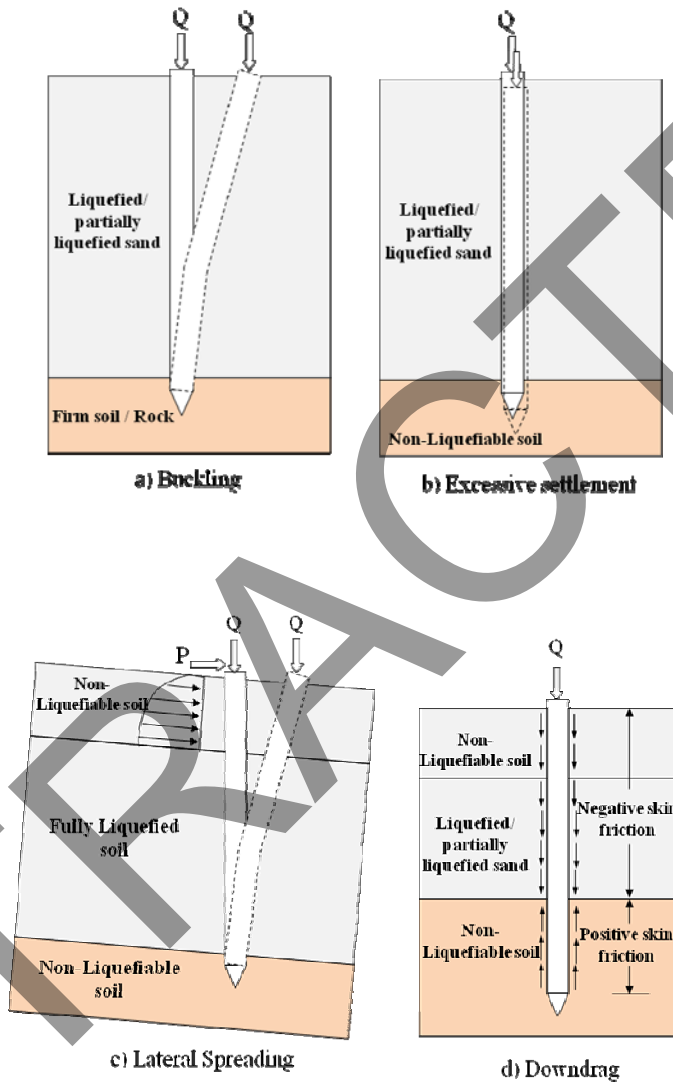

Fig. 1. Different failure modes for a single pile under axial load.

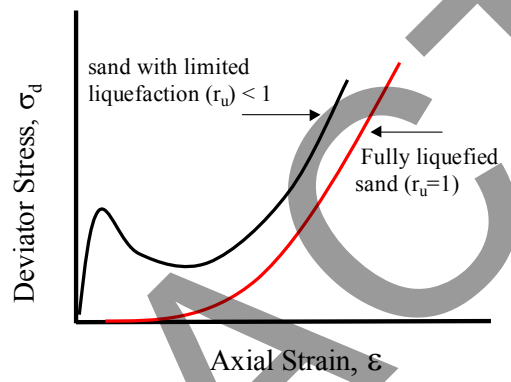

**Fig. 2.** Variation of near-field strength for fully and limited liquefied sand.

Figure 3

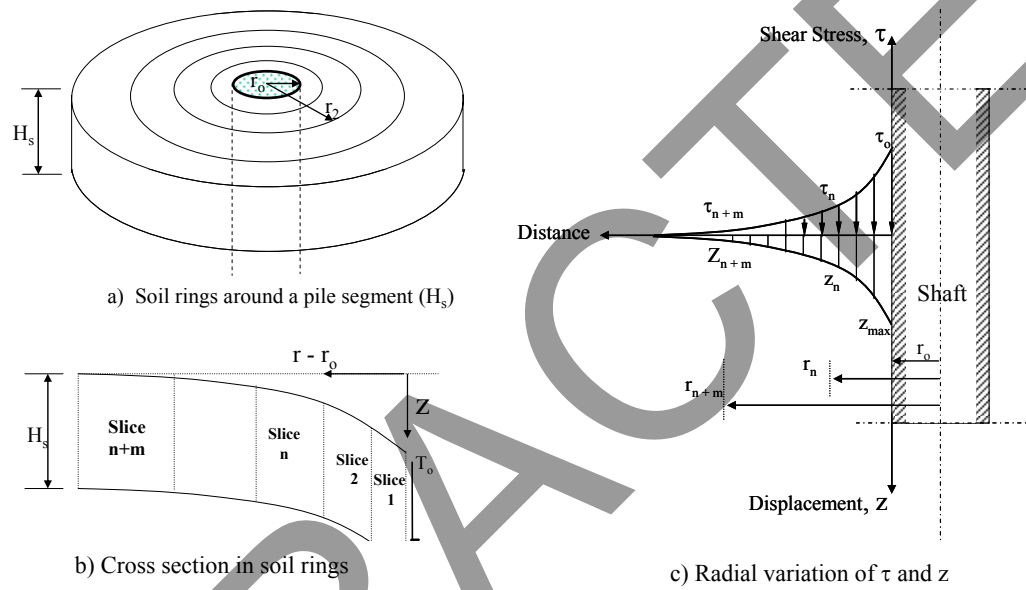

Fig. 3. Modeling sand-pile interaction

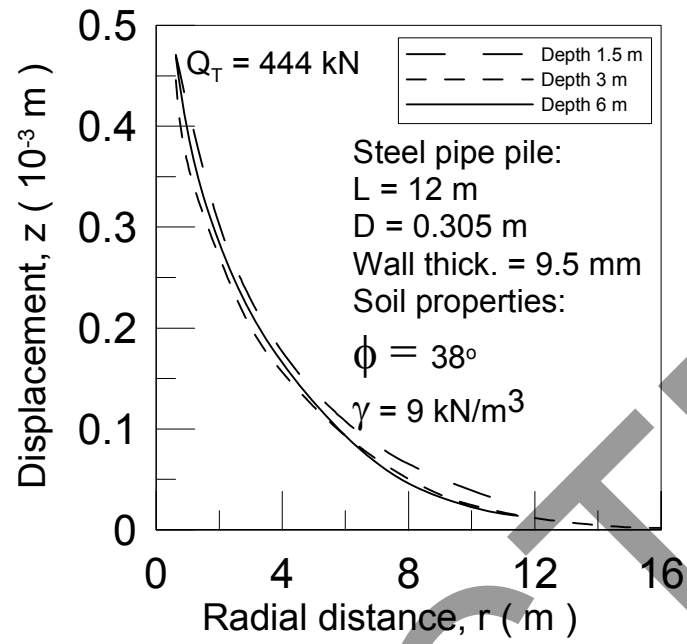

**Fig. 4.** Radial variation of displacement in the surrounding sand using PLAXIS-3D.

Figure 5

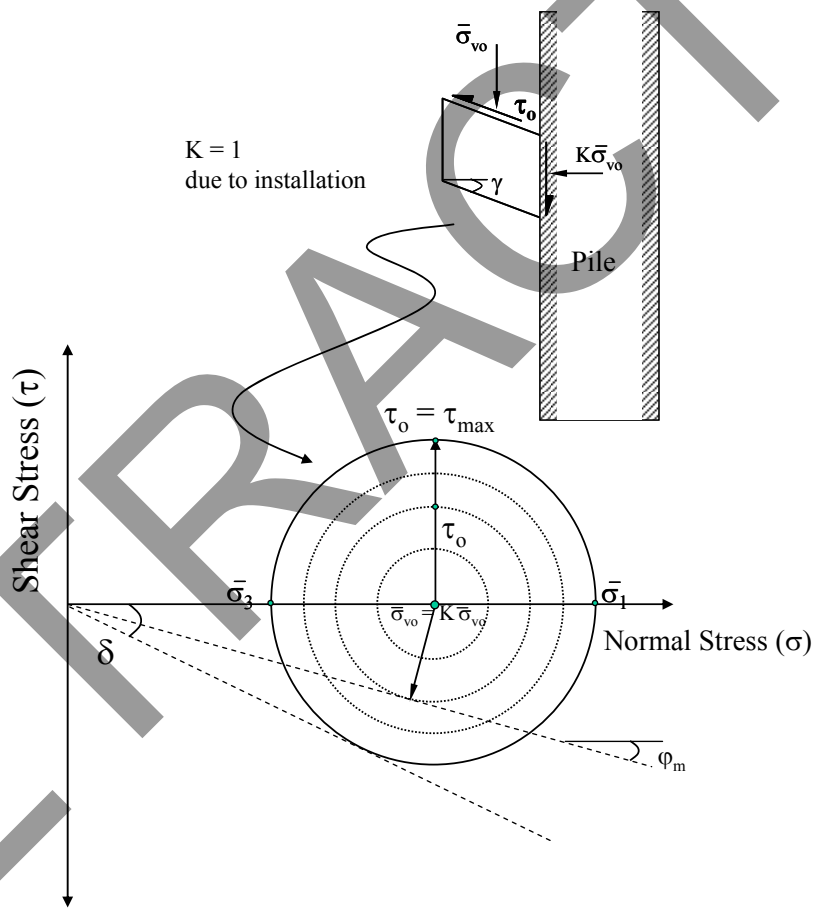

Fig. 5. The progress of shear stress at the soil-pile interface.

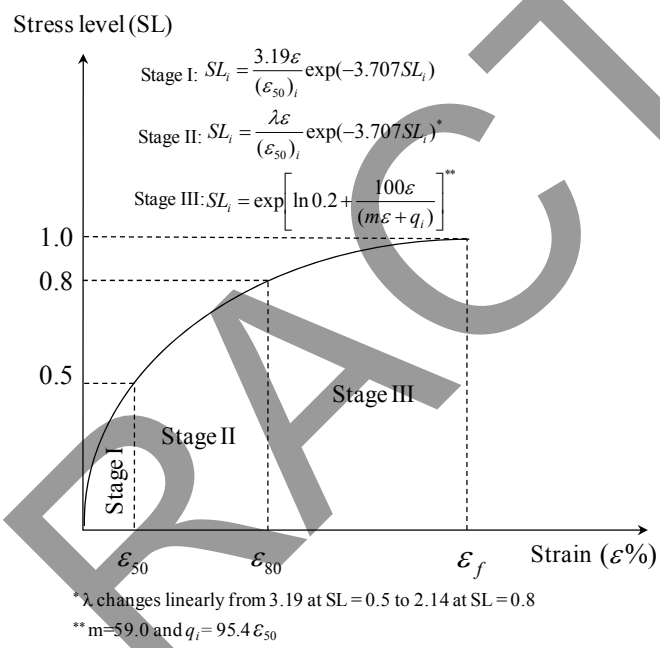

**Fig. 6.** Stress-strain soil model developed by (After Norris 1985 and Ashour et al. 1998).

Figure 7

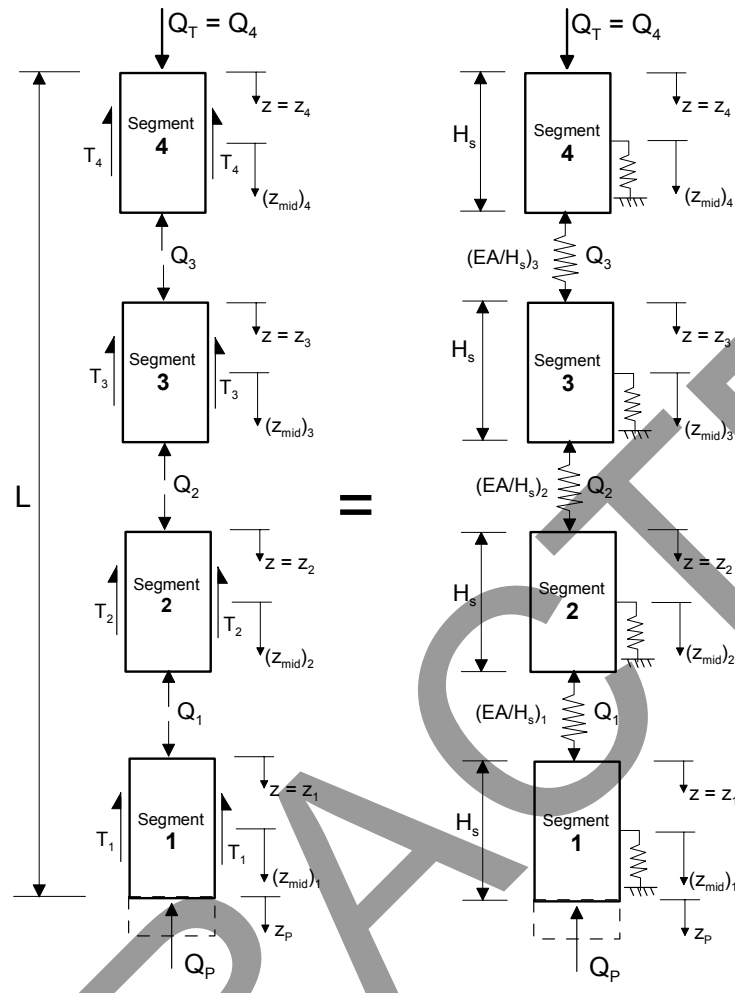

Fig. 7. Pile segment modeling in the global analysis of axially loaded pile.

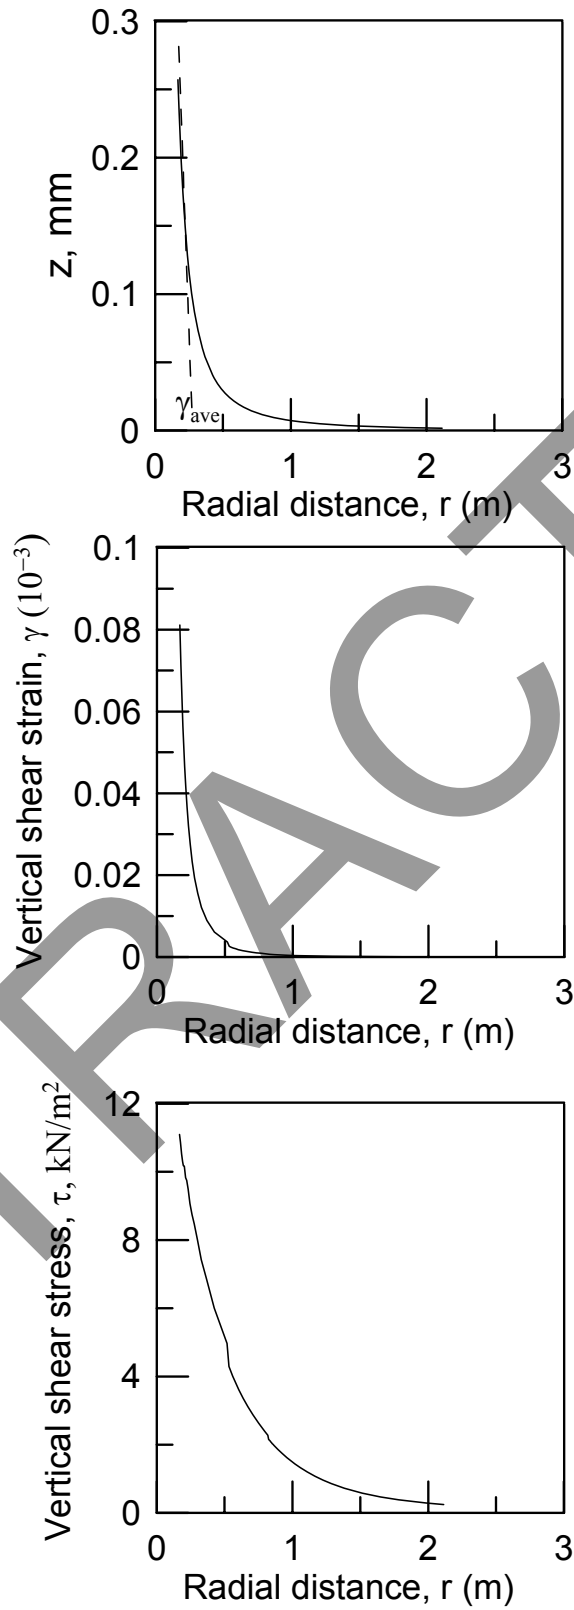

Fig. 8. Radial degradation of displacement and shear stress/strain in sand around the pile



Figure 9

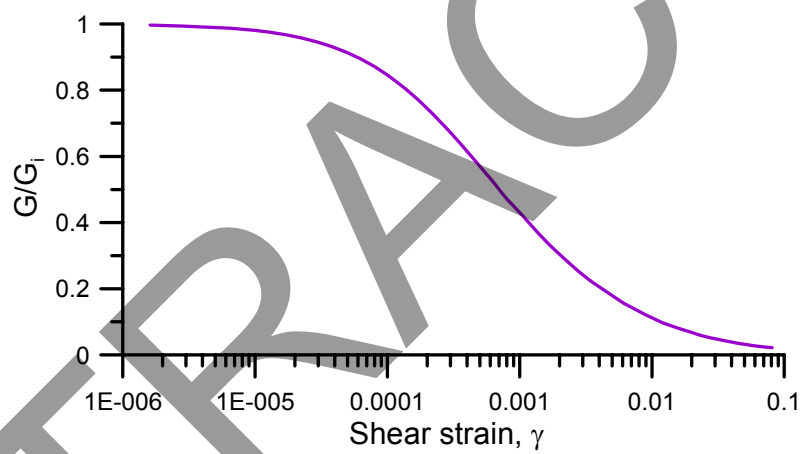

**Fig. 9.** Shear modulus degradation curve from the utilized soil model.

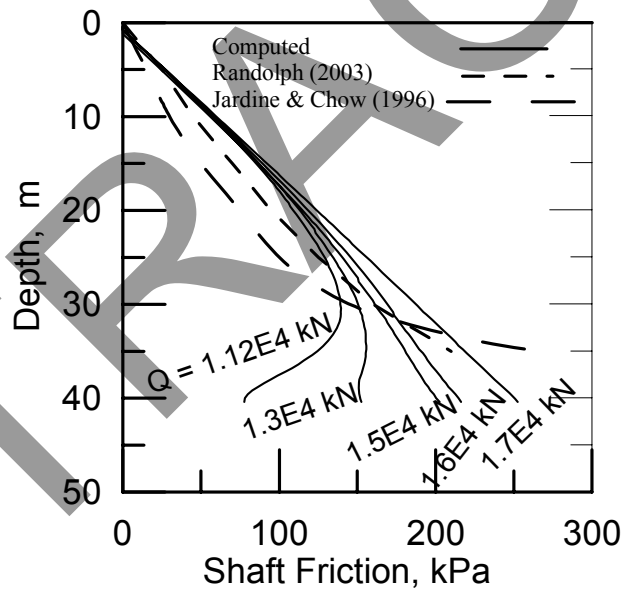

**Fig. 10.** Computed mobilized soil-pile frictional resistance

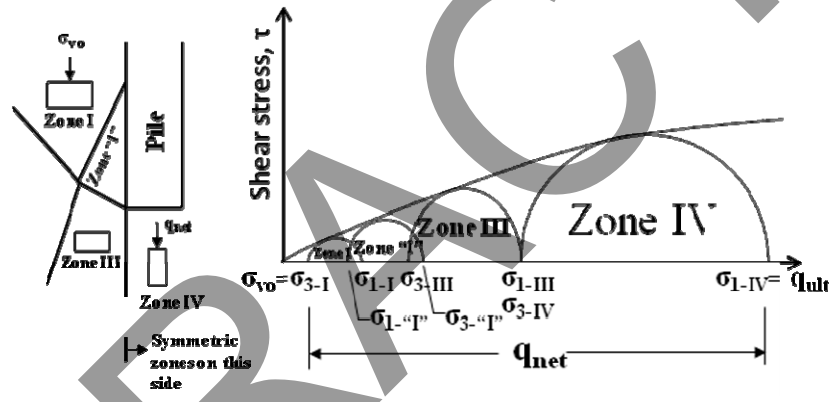

Fig. 11. Degradation in the secant friction angles of circles tangent to a curvilinear envelope of sand due to the increase in the confining pressure (Elfass, 2001).

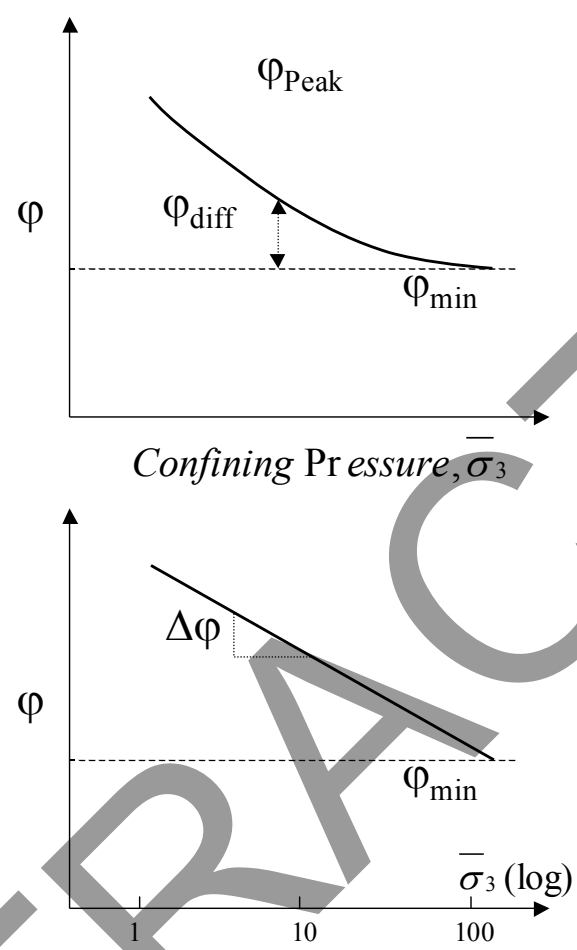

**Fig. 12.** Changes of Friction Angle ( $\phi$ ) with the Confining Pressure (Ashour et al. 2004).

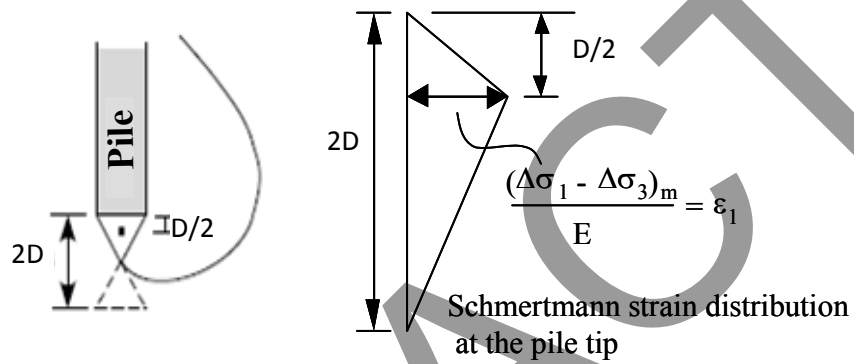

**Fig. 13.** Strain profile and the associated mobilized stresses immediately below the pile tip, (after Elfass 2001).

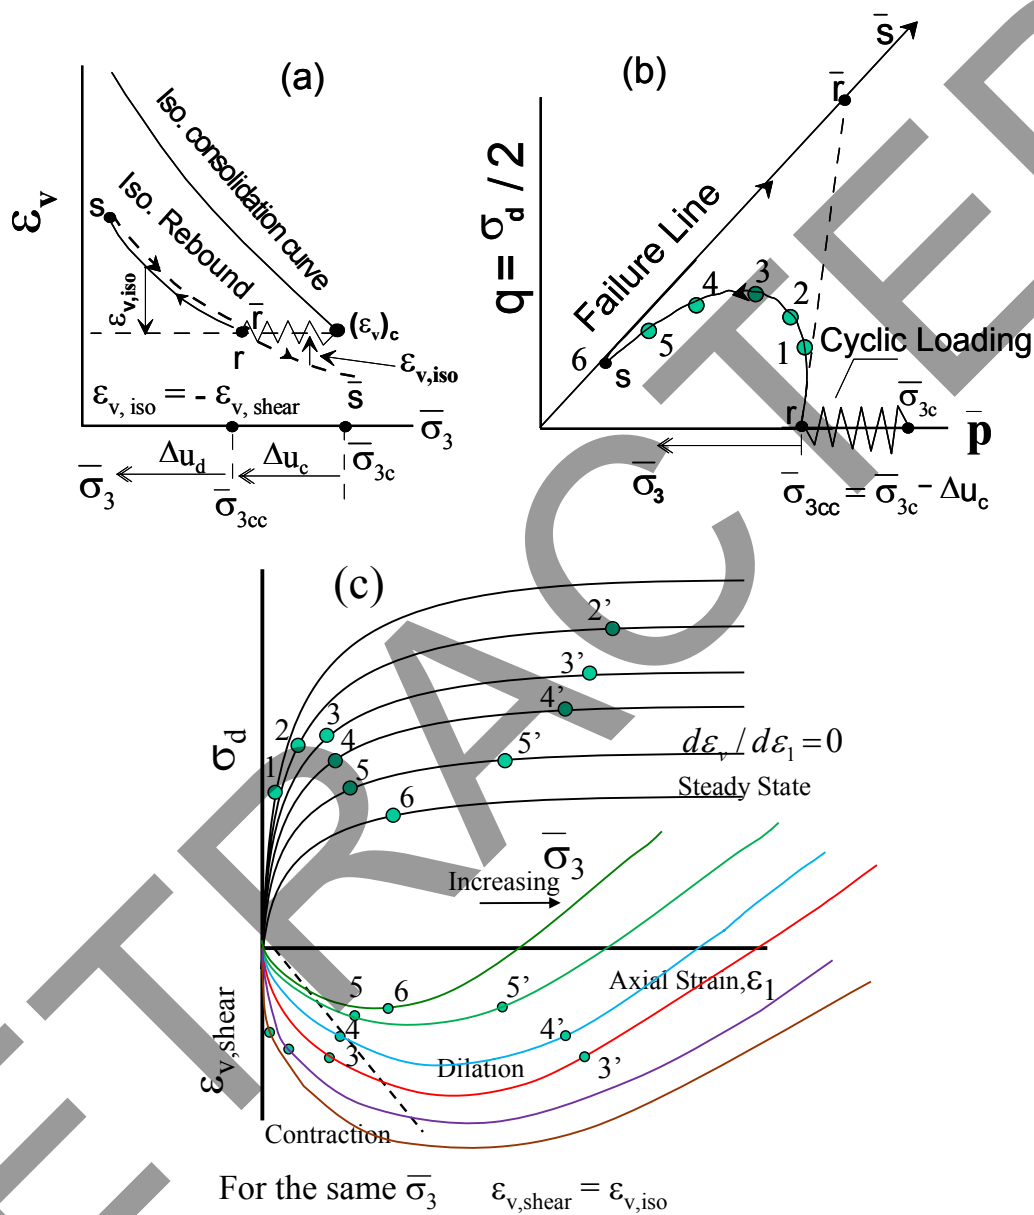

**Fig. 14.** Interrelationship among a) isotropic consolidation rebound. b) undrained stress path  
 c) drained and undrained stress-strain behavior

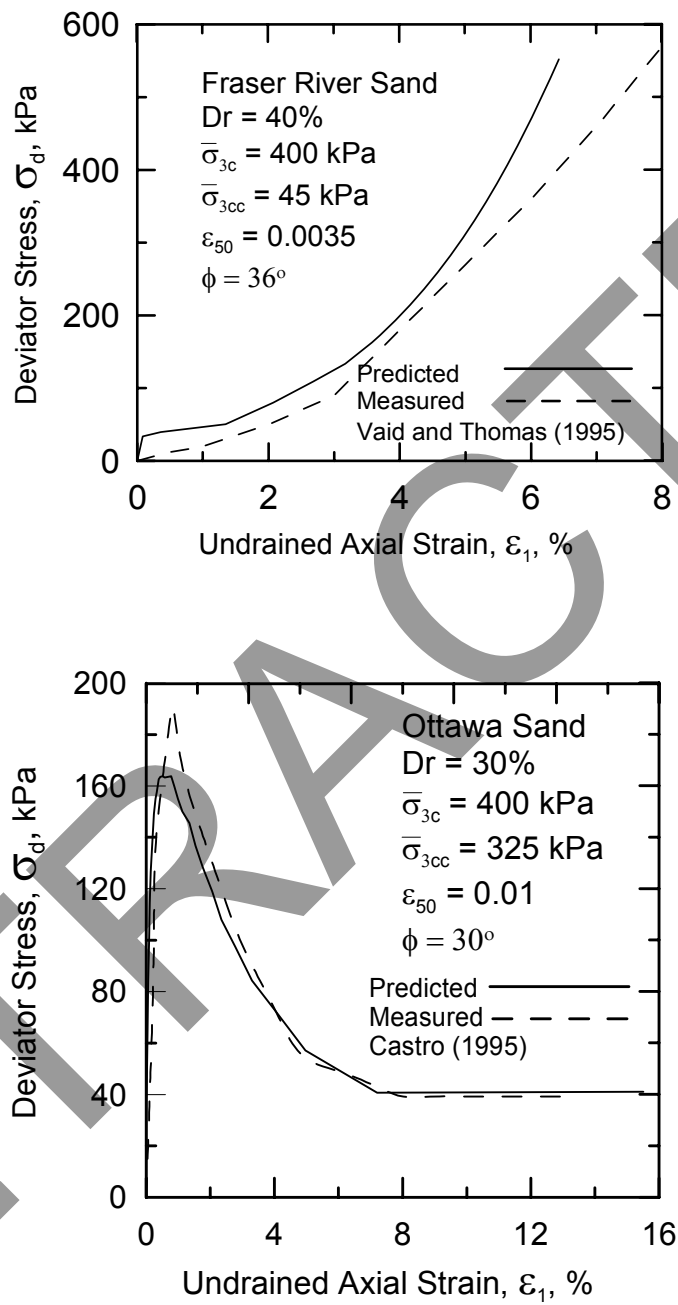

**Fig. 15.** Undrained behavior of saturated sands with limited liquefaction.

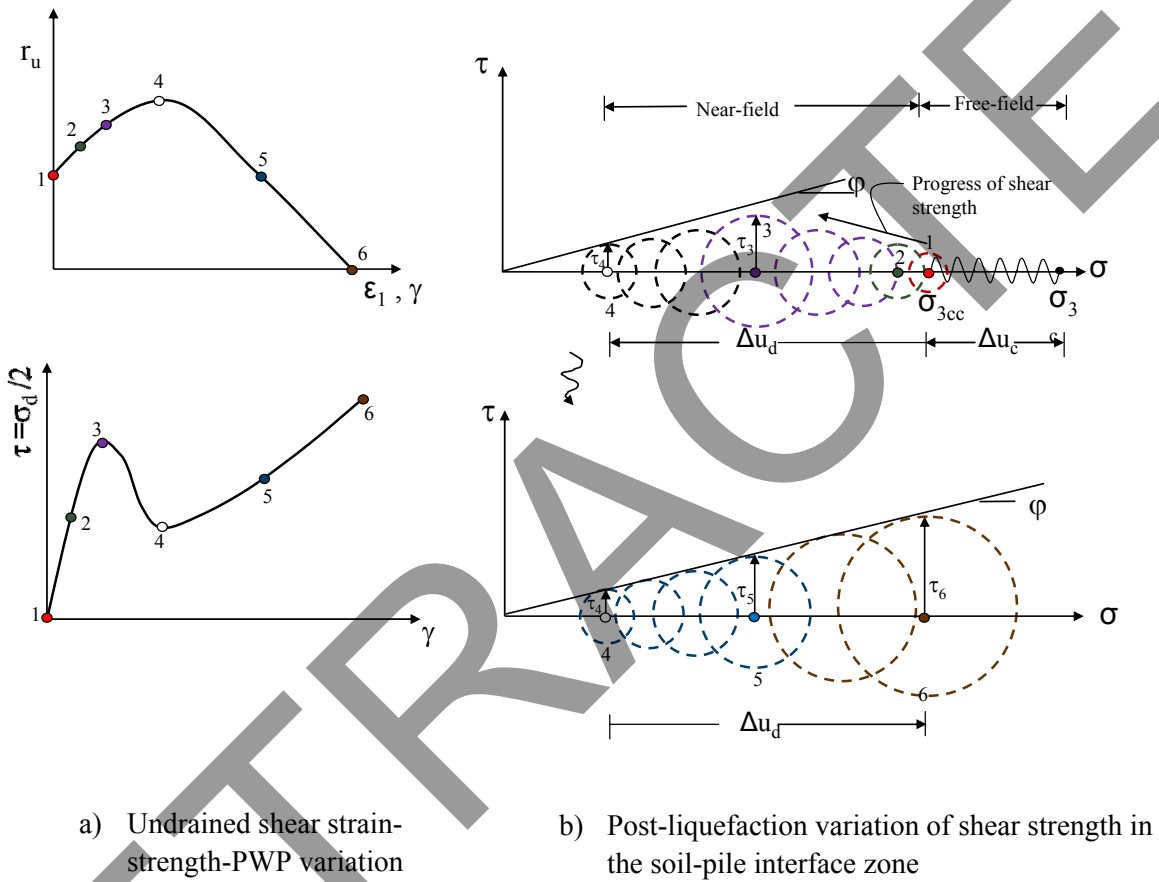

**Fig. 16.** Variation of shear strain-strength and water pressure ratio in the partially liquefied sand around the pile.



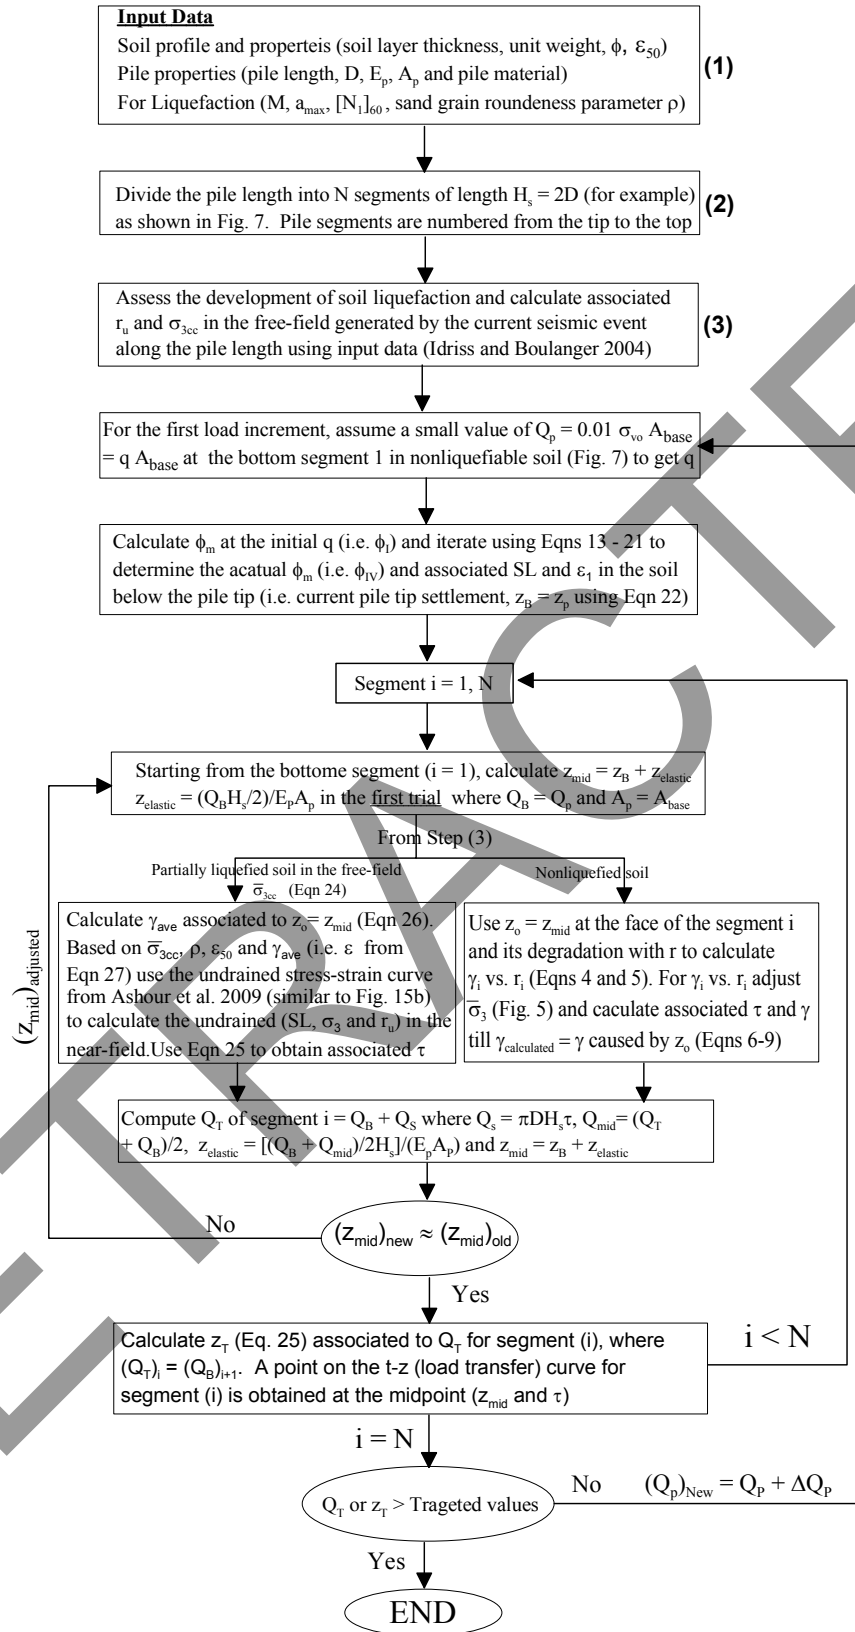

Fig. 17 Flowchart for the calculations of the presented methodology.

Figure 18

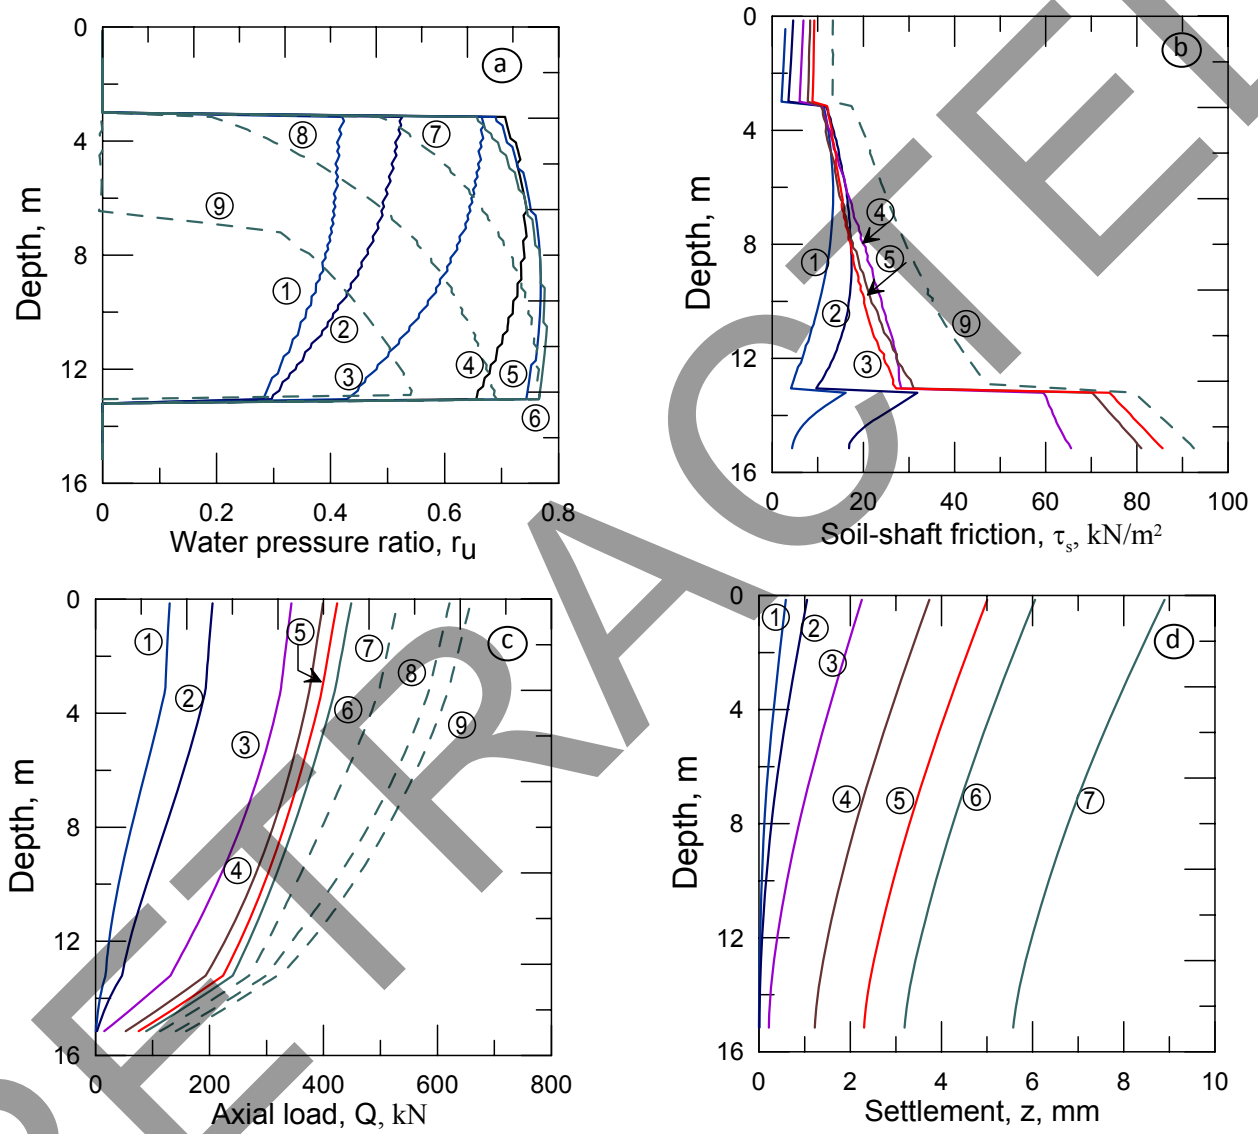

**Fig. 18.** Variation of  $r_u$ ,  $\tau_s$  (or  $f_s$ ),  $Q$  and  $z$  under monotonic pile head axial load ( $Q_T$ )

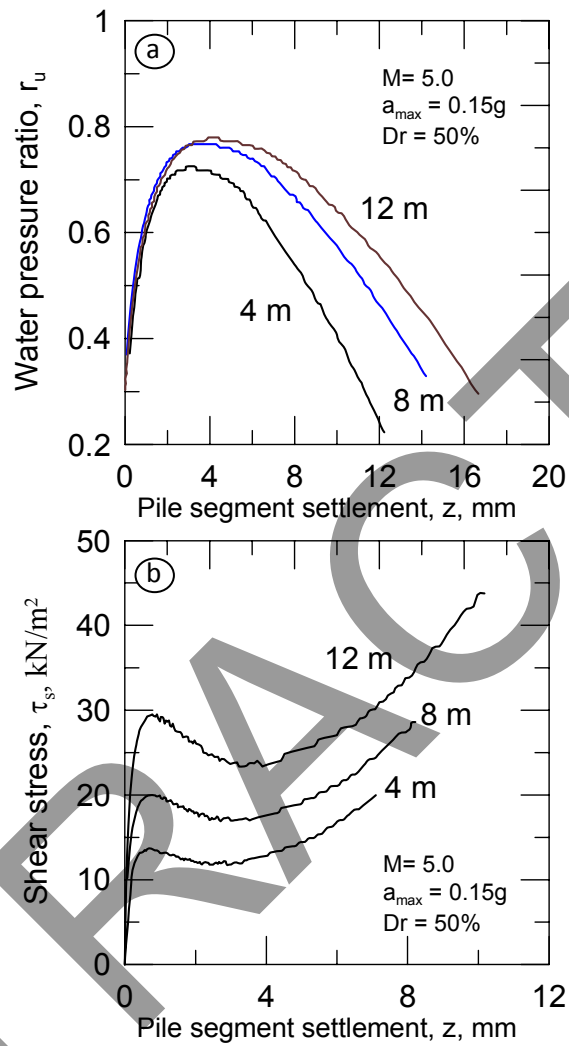

Fig. 19. Variation of  $r_u$ , and  $\tau_s$  versus pile displacement  $z$  at different depths.

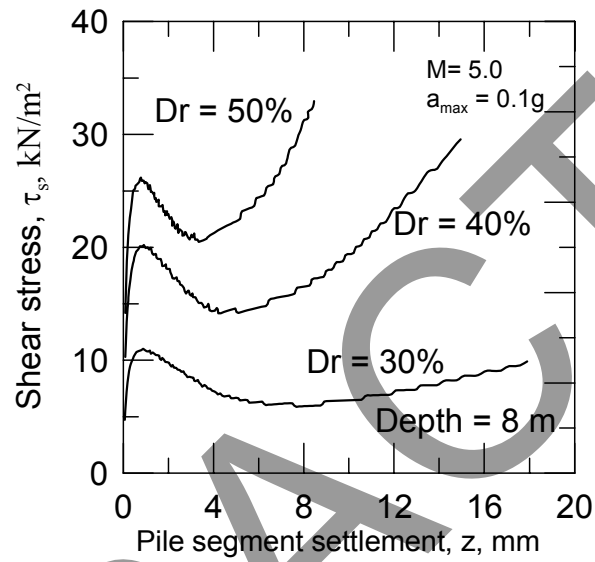

**Fig. 20.** Effect of  $D_r$  of partially liquefied sand on the  $(t-z)$  curve shape.

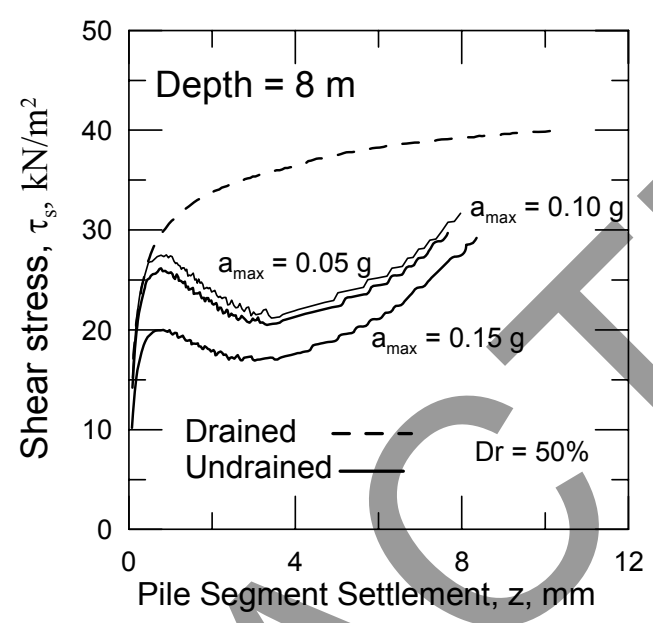

**Fig. 21.** Effect of  $a_{max}$  on the shape of the t-z curve of sand with limited liquefaction.

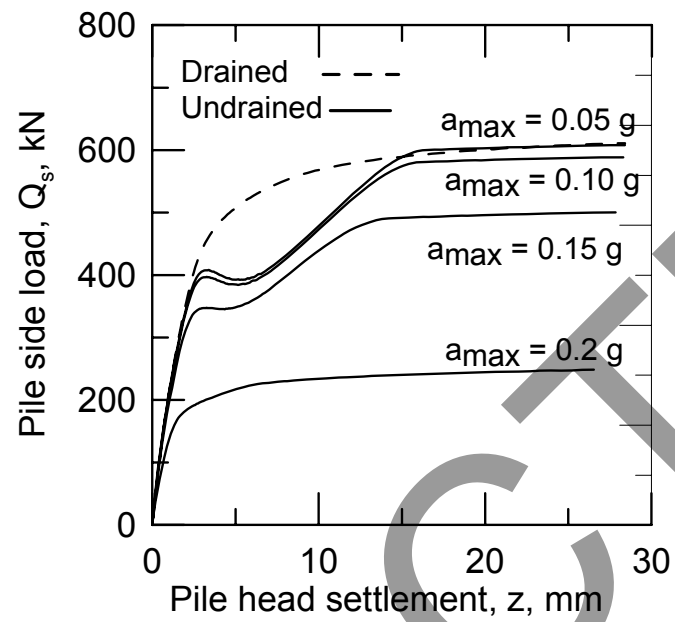

**Fig. 22.** Effect of  $a_{max}$  on the load carried by the pile shaft ( $Q_s$ ) due to soil liquefaction.

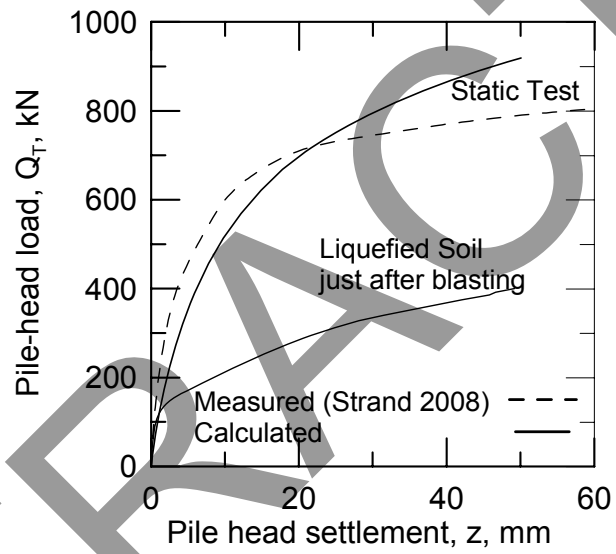

**Fig. 23.** Comparison of measured and computed pile head load settlement.

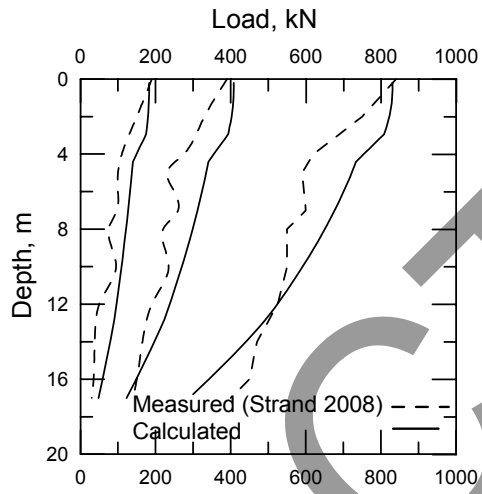

Fig. 24. Measured and computed pre-blasting axial load along the pile.



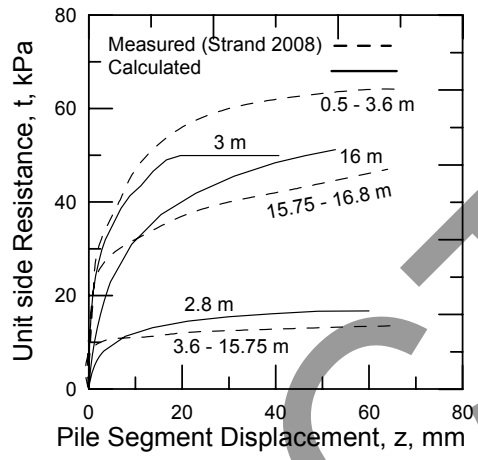

Fig. 25. Comparison of measured and computed static t-z curves.

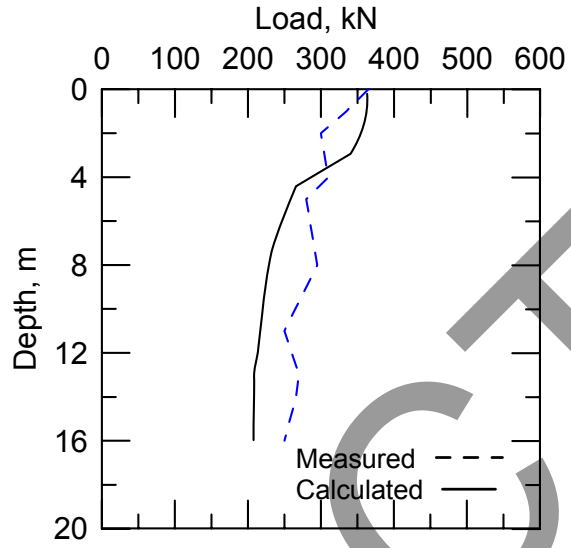

**Fig. 26.** Measured and computed axial load along the pile immediately after the blast.

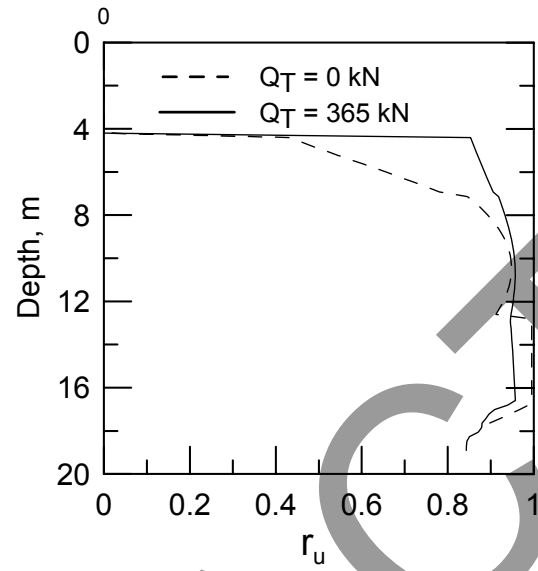

**Fig. 27.** Computed  $r_u$  into the liquefied soil due to axial load after blasting.

**Fig. 1.** Different failure modes for a single pile under axial load.

**Fig. 2.** Variation of near-field strength for fully and limited liquefied sand.

**Fig. 3.** Modeling sand-pile interaction

**Fig. 4.** Radial variation of displacement in the surrounding sand using PLAXIS-3D.

**Fig. 5.** The progress of shear stress at the soil-pile interface.

**Fig. 6.** Stress-strain soil model developed by (After Norris 1985 and Ashour et al. 1998).

**Fig. 7.** Pile segment modeling in the global analysis of axially loaded pile.

**Fig. 8.** Radial degradation of displacement and shear stress/strain in sand around the pile

**Fig. 9.** Shear modulus degradation curve from the utilized soil model.

**Fig. 10.** Computed mobilized soil-pile frictional resistance

**Fig. 11.** Degradation in the secant friction angles of circles tangent to a curvilinear envelope of sand due to the increase in the confining pressure (Elfass, 2001).

**Fig. 12.** Changes of Friction Angle ( $\varphi$ ) with the Confining Pressure (Ashour et al. 2004).

**Fig. 13.** Strain profile and the associated mobilized stresses immediately below the pile tip, (after Elfass 2001).

**Fig. 14.** Interrelationship among a) isotropic consolidation rebound b) undrained stress path c) drained and undrained stress-strain behavior

**Fig. 15.** Undrained behavior of saturated sands with limited liquefaction.

**Fig. 16.** Variation of shear strain-strength and water pressure ratio in the partially liquefied sand around the pile.

**Fig. 17.** Flowchart for the calculations of the presented methodology.

**Fig. 18.** Variation of  $r_u$ ,  $\tau_s$  (or  $f_s$ ),  $Q$  and  $z$  under monotonic pile head axial load ( $Q_T$ )

**Fig. 19.** Variation of  $r_u$ , and  $\tau_s$  versus pile displacement  $z$  at different depths.

**Fig. 20.** Effect of  $D_r$  of partially liquefied sand on the (t-z) curve shape.

**Fig. 21.** Effect of  $a_{max}$  on the shape of the t-z curve of sand with limited liquefaction.

**Fig. 22.** Effect of  $a_{max}$  on the load carried by the pile shaft ( $Q_s$ ) due to soil liquefaction.

**Fig. 23.** Comparison of measured and computed pile head load settlement.

**Fig. 24.** Measured and computed pre-blasting axial load along the pile.

**Fig. 25.** Comparison of measured and computed static t-z curves.

**Fig. 26.** Measured and computed axial load along the pile immediately after the blast.

**Fig. 27.** Computed  $r_u$  into the liquefied soil due to axial load after blasting.

RETRACTED
